## **Genome wide association analysis uncovers variants for reproductive variation across dog breeds and links to domestication**

Samuel P. Smith<sup>1,2,3\*</sup>, Julie B. Phillips<sup>1,4\*</sup>, Maddison L. Johnson<sup>1</sup>, Patrick Abbot<sup>1</sup>, John A.  
Capra<sup>1,5,6</sup> and Antonis Rokas<sup>1,5,6,\*</sup>

<sup>1</sup>Department of Biological Sciences, Vanderbilt University, Nashville, TN, USA

<sup>2</sup>Center for Computational Molecular Biology, Brown University, Providence, Rhode Island,  
02912, USA

<sup>3</sup>Department of Ecology and Evolutionary Biology, Brown University, Providence, RI 02912,  
USA

<sup>4</sup>Department of Biological Sciences, Cumberland University, Lebanon, TN, USA

<sup>5</sup>Department of Biomedical Informatics, Vanderbilt University, Nashville, TN 37203, USA

<sup>6</sup>Vanderbilt Genetics Institute, Vanderbilt University Medical Center, Nashville, TN 37232,  
USA

\* These authors contributed equally

**Short title:** Probing the genetic basis of reproductive traits across dog breeds

**Keywords:** life history; artificial selection; trade-off; preterm birth; prematurity;  
pregnancy

**\*Corresponding Author:** [antonis.rokas@vanderbilt.edu](mailto:antonis.rokas@vanderbilt.edu)

## Abstract

The diversity of eutherian reproductive strategies has led to variation in many traits, such as number of offspring, age of reproductive maturity, and gestation length. While reproductive trait variation has been extensively investigated and is well established in mammals, the genetic loci contributing to this variation remain largely unknown. The domestic dog, *Canis lupus familiaris* is a powerful model for studies of the genetics of inherited disease due to its unique history of domestication. To gain insight into the genetic basis of reproductive traits across domestic dog breeds, we collected phenotypic data for four traits, cesarean section rate, litter size, stillbirth rate, and gestation length, from primary literature and breeders' handbooks. By matching our phenotypic data to genomic data from the Cornell Veterinary Biobank, we performed genome wide association analyses for these four reproductive traits, using body mass and kinship among breeds as co-variates. We identified 13 genome-wide significant associations between these traits and genetic loci, including variants near *CACNA2D3* with gestation length, *MSRB3* and *KRT71* with litter size, *SMOC2* with cesarean section rate, and *HTR2C* with stillbirth rate. Some of these loci, such as *CACNA2D3* and *MSRB3*, have been previously implicated in human reproductive pathologies, whereas others have been previously associated with domestication-related traits, including brachycephaly (*SMOC2*), coat curl (*KRT71*), and tameness (*HTR2C*). These results raise the hypothesis that the artificial selection that gave rise to dog breeds also shaped the observed variation in their reproductive traits. Overall, our work establishes the domestic dog as a system for studying the genetics of reproductive biology and disease.

## Lay Summary

Variation in reproductive traits across mammals has been extensively investigated and is well established, but the genetic contributors to this variation remain largely unknown. Here, we take advantage of the domestic dog, a powerful model for mammalian genetics, to gain insight into the genetic basis of reproductive traits. By examining the association between more than a hundred thousand genetic variants and four reproductive traits that vary extensively across dog breeds, we identified more than a dozen significant associations for cesarean section rate, litter size, stillbirth rate, and gestation length. Some of the variants that we identify are nearby genes previously implicated in human reproductive pathologies, whereas several others have been previously associated with domestication-related traits. Our results establish the domestic dog as a tractable system for studying the genetics of reproductive traits and underscore the potential for cryptic interactions between reproductive and other traits favored over the course of adaptation.

## Introduction

Mammals exhibit wide variation in traits associated with reproduction (Derrickson 1992, Harrison 2001, Behringer et al. 2006). For example, gestation length can range from 12 days in the Gray dwarf hamster, *Cricetulus migratorius*, to 21 months in the African bush elephant, *Loxodonta africana* (Jones et al. 2009, Kiltie 1992, Martin et al. 1985); neonate size can range from less than one gram in the shrew family (Soricidae), to more than a metric ton in the baleen whales (Balaenopteridae) ( Jones et al. 2009, Martin et al. 1985); and neonates can be either precocial (e.g., cricetid rodents, rabbits, and canids) or altricial (e.g., hystricomorph rodents, ungulates, and cetaceans) (Derrickson 1992). This variation in reproductive traits also extends to methods of implantation (Cross et al. 1994), structure of the placenta (Enders et al. 2004, Elliot et al. 2009), and lactation strategies (Pond 1977, Lefèvre et al. 2011). Not surprisingly, many reproductive traits also exhibit substantial intra-specific variation (Kiltie 1982). For example, many mammals exhibit intraspecific variation in gestation length, including primates (Cross et al. 1981), rat and rabbits (Hudson et al. 1999), as well as the domesticated cattle (Burris et al. 1952) and thoroughbred horses (Davies et al. 2002). Similarly, body fat percentages, which are associated with the energetics of reproduction, vary greatly between wild and captive baboons, and intraspecific variation among captive lemurs can vary from 8 – 41% (Dufour et al. 2002).

The existence of phenotypic variation in reproductive traits is well established, and can inform our understanding of the factors that shape patterns of survival and reproduction in both agricultural (Carneiro et al. 2015, Sironen et al. 2010, Bolormaa et al. 2010, Maltecca



et al. 2011) and human populations (Walker et al. 2006). Not surprisingly, most genome wide association (GWAS) studies of reproductive traits focus on economically important traits in domesticated species, such as reproductive seasonality in rabbits (Carneiro et al. 2015), infertility in pigs (Sironen et al. 2010), and dairy traits in cattle (Bolormaa et al. 2010). GWAS studies focused on understanding human reproductive biology and its associated pathologies have also shed light on the genetic basis of reproductive traits, including birth weight (Horikoshi et al. 2016) and gestational duration or length (Plunkett et al. 2011, Zhang et al. 2015, Zhang et al. 2017). For example, maternal variation in six genomic loci (*ADCY5*, *AGTR2*, *EBF1*, *EEFSEC*, *RAP2C*, and *WNT4*) is associated with gestational duration and preterm birth (Zhang et al. 2017). While these studies contribute to our understanding of the genetic architecture of reproductive traits, we still understand very little about the molecular pathways underlying this variation and are unable to explain the majority of the heritability in reproductive traits (Cassady et al. 2001, Langlois et al. 2012, Johanson et al. 2011).

To address this challenge, we studied the genetics of reproductive traits in a powerful new model system: the domestic dog. The dog is well-suited to this question, because the domestication bottleneck followed by intense artificial selection and inbreeding imposed over the past 300 years has led to the generation of more than 340 recognized breeds that exhibit dramatic morphological variation (Neff et al. 2006, Beale and Ostrander 2012, Marsden et al. 2016). Domestic dog breeds also show substantial variation in their reproductive traits. For example, Pomeranians and Norfolk Terriers typically have only 2 pups per litter, whereas Dalmatians and Rhodesian Ridgebacks typically sire 8-9 pups per

litter (Evans et al. 2010). Similarly, 80 – 90% of French Bulldogs and Boston Terriers are born via cesarean section due to cephalopelvic disproportion, whereas only 2 – 3% of Australian Shepherds and Shar Peis require cesareans (Evans and Adams 2010). Recent analyses have begun to study the genetic mechanisms that underlie the remarkable morphological variation between modern dog breeds in diverse traits such as snout length, ear erectness, and tail curliness (Hayward et al. 2016, Boyko et al. 2010, Vaysse et al. 2011, Marchant et al. 2017), as well as genetic disease (Karlsson et al. 2008).

To gain insight into the genetic basis of reproductive traits across domestic dog breeds, we collected phenotypic data for four reproductive traits, namely cesarean section rate, litter size, stillbirth rate, and gestation length. We synthesized data from the primary literature and breeders' handbooks to obtain coverage of between 23 (gestation length) and 97 (cesarean section rate) dog breeds, as well as body mass data from 101 dog breeds. By matching our phenotypic data to genome-wide genotypic data from the Cornell Veterinary Biobank, we performed GWAS analyses and identified 13 genetic loci that are significantly associated with these reproductive traits (using log body mass as a co-variate). Several of these variants are in or near genes previously implicated in human reproduction-related pathologies. The majority of the variants that we discovered to be significantly associated with reproductive trait variation are also associated with domestication-related traits. For example, we found that variation in a gene previously identified to be involved in brachycephaly is also significantly associated with rates of cesarean sections and that variation in genes previously linked to coat phenotypes, such as curliness, is also associated with litter size. These results suggest that selection for breed-specific morphological traits

during dog domestication may have also directly or indirectly influenced variation in reproductive traits. More broadly, our results establish the domestic dog as a tractable system for studying the genetics of reproductive traits and underscore the potential for cryptic interactions between reproductive and other traits favored over the course of adaptation.

## Results

To identify SNPs that are significantly associated with four reproductive traits in domestic dog breeds, we conducted across-breed GWAS analyses using a multivariate linear mixed model implemented in the program GEMMA (Zhou and Stephens, 2012). Number of individuals and distribution of breed varied with analysis (Supplementary Table 1). After filtering for MAF (MAF < 0.05; 10,804 SNPs were excluded) and linkage disequilibrium (34,240 additional SNPs were excluded), 115,683 SNPs were included in the GWAS analysis for each reproductive trait. To validate our GWAS approach and analytical choices, we first used our collected values for body mass, a trait whose genetic associations have been previously extensively studied in dogs (36,37). As expected, our analysis recovered the major genes associated with dog breed body mass variation, including *IGF1* ( $P = 2.1 \times 10^{-31}$ ), *SMAD2* ( $P = 1.2 \times 10^{-17}$ ) and *IGF2BP2* ( $P = 5.1 \times 10^{-11}$ ) (Supplementary Figure 1, Supplementary Table 2).

### Genetic loci that significantly associate with cesarean section rate

To examine whether there is variation in cesarean section rate among breeds, we first identified cesarean section rate values for a total of 97 of the 162 dog breeds with

genotypic data (Supplementary Table 1). The cesarean section rate values were derived from a British survey across 151 breeds covering 13,141 bitches, which had whelped 22,005 litters over the course of a 10 year period (Marsden et al. 2016). The frequency of cesarean sections was estimated as the percentage of litters reported to be born by cesarean section. Among the 97 breeds with overlapping genetic data, the median cesarean section rate is 17.1%, with a minimum of 0% in Curly Coated Retrievers and Silky Terriers and a maximum of 92.3% in Boston Terriers (Supplementary Figure 3A).

To identify SNPs that are significantly associated with the observed variation in cesarean section rate across domestic dog breeds, we conducted an across-breed GWAS analysis using 115,683 SNPs and cesarean section values across 95 dog breeds (Figure 1A, Supplementary Figure 2A). As outlined in the *permutation analysis* section of the Methods, we additionally performed a breed-specific permutation and present those variants with a permutation p-value > 0.05 as suggestive associations. We identified three significant SNPs (Supplementary Table S3), two of which mapped to genes, namely paralemmin 3 (*PALM3*, uncorrected  $P = 1.4 \times 10^{-9}$ , *Perm P* = 0.001) and sparc-related modular calcium-binding protein 2 (*SMOC2*, uncorrected  $P = 2.0 \times 10^{-7}$ , *Perm P* = 0.011), and a third that mapped to the intergenic region between the *CD36* glycoprotein and a lincRNA (uncorrected  $P = 9.7 \times 10^{-8}$ , *Perm P* = 0.024) (Figure 1A). Our GWAS analysis also recovered keratin 71 (*KRT71*, uncorrected  $P = 2.9 \times 10^{-7}$ , *Perm P* = 0.217), but its permutation p-value was above 0.05.

The first significantly associated SNP (chromosome 1: 55,983,871) is found in the intron between exons 13 and 14 of *SMOC2*, a gene that is associated with brachycephaly in dogs (Marchant et al. 2017, Bannasch et al. 2010); variation in *SMOC2* accounts for 36% of facial length variation in dogs (Marchant et al. 2017). In humans, *SMOC2* is highly expressed in endometrium as well as other reproductive tissues, including the fallopian tubes, ovaries and cervix (Figure 2) (Uhlén et al. 2015). The 3' intronic location of the SNP raises the possibility that it might be regulatory (Rose 2008).

The second SNP is found in the 3' UTR of *PALM3*, which is a member of the paralemmin gene family that also includes *PALM1*, *PALM2*, and *PALMD* (palmdelphin); members of this family are implicated in plasma membrane dynamics and as modulators of cellular cAMP signaling in the brain (Basile et al. 2006, Kutzleb et al. 1998). The function of *PALM3* may be slightly different from the rest of the genes in the family, with recent work suggesting that *PALM3* is a binding protein of the single immunoglobulin IL-1 receptor-related molecule (SIGIRR), which is a negative regulator of Toll-Interleukin-1 receptor signaling (Chen et al. 2011). In humans, *PALM3* is primarily expressed in the membranes of the stomach, kidney, parathyroid gland and epididymis (Figure 2) (Uhlén et al. 2015). The SNP (chromosome 20: 48,454,259) that is significantly associated with cesarean section rate is found in the first intron of the *PALM3* gene, suggesting that it might be involved in regulatory actions typically observed in 5' introns (Rose 2008).

The third significant SNP (chromosome 18: 20,272,961) is found in the intergenic region between the *CD36* gene and a lincRNA (ENSCAFG00000034312). The protein product of

CD36 is the fourth major glycoprotein of the platelet surface and serves as a receptor for thrombospondin in platelets (Tandon et al. 1989). Other known functions include transport of long chain fatty acids (Febbraio et al. 2001). However, we believe that this variant is more likely a replication of a previous association between the nearby *FGF4* retrotransposon and chondrodysplasia across breeds (Parker et al. 2009).

### **Genetic loci that significantly associate with litter size**

To examine whether there are SNPs that are significantly associated with variation in litter size among breeds, we retrieved litter size data from 10,810 litters of 224 breeds registered in the Norwegian Kennel Club (Borge et al. 2012). For these data, we were able to obtain average number of pups per litter values for 60 of the 162 dog breeds with overlapping genetic data (Supplementary Table 1). Among these 60 breeds, median litter size is 5.55 pups, with a maximum 8.9 in Rhodesian Ridgebacks and a minimum of 2.4 in Pomeranians (Supplementary Figure 3B).

To identify SNPs, and genes proximal to them, that are significantly associated with the observed variation in litter size across domestic dog breeds, we conducted an across-breed GWAS analysis using 115,683 SNPs and litter size data from 60 dog breeds (Figure 1B, Supplementary Figure 2B). We identified two significant and one marginally significant SNPs (Supplementary Table S4) intersecting three genes, namely keratin 71 (*KRT71*, uncorrected  $P = 2.2 \times 10^{-8}$ ,  $Perm P = 0.017$ ), RNA Terminal Phosphate Cyclase-Like 1 (*RCL1*, uncorrected  $P = 2.6 \times 10^{-8}$ ,  $Perm P = 0.001$ ) and microphthalmia-associated transcription factor (*MITF*, uncorrected  $P = 3.5 \times 10^{-7}$ ,  $Perm P = 0.079$ ). The *KRT71*

SNP is the same variant that was marginally associated with variation in cesarean section rate described above, but in this instance its association with the trait remains significant after permutation analysis. Another three significant SNPs were found in intergenic regions; two were nearby genes *MSRB3* (methionine sulfoxide reductase B3, uncorrected  $P = 1.3 \times 10^{-7}$ ,  $Perm P = 0.001$ ) and *MSANTD1* (Myb/SANT DNA binding domain containing, uncorrected  $P = 1.5 \times 10^{-9}$ ,  $Perm P = 0.001$ ), respectively. The final variant was near an RNA of unknown function (ENSCAFG00000021196, uncorrected  $P = 3.8 \times 10^{-10}$ ,  $Perm P = 0.001$ ).

The *RCL1* SNP (chromosome 1: 93,189,363) is found in the intron between exons 7 and 8. *RCL1* functions in the maturation of 18s RNA (Lyng et al. 2006) and is associated with cervical cancer; one role of the gene in this cancer pathology is thought to involve the regulation of insulin receptors (Lyng et al. 2006). Additionally, a rare missense variation in *RCL1* was recently associated with depression (Amin et al. 2017).

The *KRT71* SNP (chromosome 27: 2,539,211) results in a missense mutation of exon 2 of the gene, which belongs to a family of keratin genes specifically expressed in the inner root sheath of hair follicles (Langbein et al. 2003). Prior analysis in dogs identified variation in gene *KRT71*, along with variation in genes *RSPO2* and *FGF5*, accounting for most coat phenotypes (Cadieu et al. 2009), such as curliness.

Another SNP (chromosome 10: 8,114,328) significantly associated with litter size is found in the intergenic region downstream of *MSRB3*, whose protein product catalyzes the

reduction of methionine-R-sulfoxides to methionine and repairs oxidatively damaged proteins (Brot et al. 1981, Kim et al. 2004). In humans, mutations in *MSRB3* are associated with deafness (Ahmed et al. 2011). Epigenetic changes of *MSRB3* in the fetus during pregnancy may affect length of gestation, with increased DNA methylation correlated with increased gestational age (Lee et al. 2012, Schierding et al. 2014). Furthermore, *MSRB3* shows an increase in mRNA expression in ripe (at term) versus unripe human uterine cervix, implying that *MSRB3* functions to ripen the cervix before the onset of labor (Hassan et al. 2009). In previous morphological studies in dogs, *MSRB3* is associated with ear erectness (Boyko et al. 2010).

The last SNP (chromosome 6: 61,062,626) that is significantly associated with litter size is located downstream of *MSANTD1*, which is part of a gene network believed to aid in cell-to-cell signaling and interaction, hematological system development and function, and immune cell trafficking (Yu et al. 2014). *MSANTD1* has been identified in two independent studies as a candidate gene for the determination of black coat color in goats (Benjelloun et al. 2015, Wang et al. 2016).

Finally, following permutation analysis, the association between the *MITF* SNP ( $Perm P = 0.079$ ) and litter size was just above the threshold for significance and can only be considered as suggestive. The *MITF* SNP (chromosome 20: 21,848,176) is found in the intron between exons 4 and 5. *MITF* plays an integral role in the development of neural crest-derived melanocytes and optic cup-derived retinal pigment epithelial cells. In human melanocytes, *MITF* is a regulator of *DIAPH1*, a member of the formin gene family whose



members are highly expressed in reproductive tissues and have been associated with a variety of reproductive phenotypes (Carreira et al. 2006, Lamm et al. 2018, Cruickshank et al. 2013, Elovitz et al. 2014, Montenegro et al. 2009). *DIAPH1* expression is increased in spontaneous term and preterm labor myometrial tissues (Lartey et al. 2007). In domesticated animals, *MITF* is a well characterized gene associated with coat color (Boyko et al. 2010, Wang et al. 2016). In humans, *MITF* is expressed in melanocytes, as well as reproductive tissues including the endometrium and cervix (Figure 2) (Uhlén et al. 2015).

### **Genetic loci that significantly associate with stillbirth rate**

To examine whether there are SNPs that are significantly associated with variation in stillbirth rate among breeds, we retrieved data for stillbirth rates for 57 of the 162 dog breeds (Supplementary Table 1). The data covers 10,810 litters of 224 breeds registered in the Norwegian Kennel Club and defines perinatal mortality as the sum of stillborn puppies and puppies that died during the first week after birth (Tønnessen et al. 2012). Among these 57 breeds with overlapping genomic data, the median stillbirth rate is 4.2 pups, with a maximum rate of 12.3% in Saint Bernards and a minimum of 0% in Basenjis and Italian Greyhounds (Supplementary Figure 3C).

To test if any SNPs are significantly associated with the observed variation in stillbirth rate across domestic dog breeds, we conducted an across-breed GWAS analysis using 115,683 SNPs and stillbirth rate data from 56 dog breeds (Figure 1C, Supplementary Figure 2C). We identified five significant and marginally significant SNPs (Supplementary Table S5); five intersecting 4 genes, 5-Hydroxytryptamine receptor 2C (*HTR2C*, uncorrected  $P = 2.0 \times$

$10^{-7}$ , *Perm P* = 0.001), keratin 71 (*KRT71*, uncorrected  $P = 3.2 \times 10^{-9}$ , *Perm P* = 0.064), and microphthalmia-associated transcription factor (*MITF*, uncorrected  $P = 1.4 \times 10^{-7}$ , *Perm P* = 0.079), and SP140 nuclear body protein (*SP140*, uncorrected  $P = 2.76 \times 10^{-8}$ , *Perm P* = 0.001) and one in an intergenic region near a snoRNA (ENSCAFG00000027305, uncorrected  $P = 1.3 \times 10^{-7}$ , *Perm P* = 0.002) of unknown function. The *KRT71* SNP associated with variation in stillbirth rate is the same one as that associated with litter size described above. Similarly, the *MITF* SNP associated with variation in stillbirth rate is the same as that associated with litter size. However, both of these associations have permutation p-values > 0.05 and thus can only be considered as tentative.

The *SP140* SNP (chromosome 25: 42,482,266) resides in the intro between exons 4 and 5. *SP140* is the lymphoid-restricted homolog of *SP100* expressed in mature B cells, as well as some T cells (Bloch et al. 1996). High levels of *SP140* mRNA are detected in human spleen and peripheral blood leukocytes, but not other human tissues (Bloch et al., 1996). *SP140* expression has been implicated in innate response to immunodeficiency virus type 1 (Madani et al. 2002). Finally, *SP140* was the gene showing the largest difference in expression level between normal and preeclamptic placentas (Heikkilä et al. 2005).

The *HTR2C* SNP (chromosome X: 87,378,551) is located in the intron between exons 3 and 4. *HTR2C* is one of the most important and extensively studied serotonin receptors (Drago et al. 2009). *HTR2C* has ten fixed SNP differences between dogs and wolves, and also belongs to the behavioral fear response (Li et al. 2013). Additionally, *HTR2C* is differentially

expressed in the brain between tame and aggressive mice and foxes (Kukekova et al. 2011), providing additional evidence for its involvement in the tame behaviors of domesticated dogs (Li et al. 2013).

### **Genetic loci that significantly associate with gestation length**

To examine whether there is variation in gestation length among breeds, we identified individual gestation length averages by breed predominantly in breeder handbooks. Utilizing breeders' handbooks, we were able to identify gestation length means for a total of 23 of the 162 dog breeds that we had genotypic data for (Supplementary Table 1). Among these 23 breeds, the median gestation length is 62.2 days, with a maximum length of 65.3 in beagles and a minimum of 60.1 in the Alaskan Malamute (Supplementary Figure 3D).

To identify SNPs, and genes proximal to them, that are significantly associated with the observed variation in gestation length across domestic dog breeds, we conducted an across-breed GWAS analysis using 115,683 SNPs and gestation length data from 23 dog breeds (Figure 1D, Supplementary Figure 2D). Our analysis identified six significantly associated SNPs (Supplementary Table S6) that mapped to 4 genes, namely solute carrier family 9 (*SLC9A8*, uncorrected  $P = 3.7 \times 10^{-11}$ ,  $Perm P = 0.001$ ), calcium channel, voltage-dependent, alpha-2/delta Subunit 3 (*CACNA2D3*, uncorrected  $P = 3.1 \times 10^{-7}$ ,  $Perm P = 0.013$ ), microtubule associated tumor suppressor candidate 2 (*MTUS2*, uncorrected  $P = 3.6 \times 10^{-7}$ ,  $Perm P = 0.001$ ), and helicase family member 1 (*HFM1*, uncorrected  $P = 4.0 \times 10^{-7}$ ,  $Perm P = 0.013$ ), and two lincRNAs

(ENSCAFG00000037743, uncorrected  $P = 4.4 \times 10^{-7}$ ,  $Perm P = 0.001$ , and ENSCAFG00000039067, uncorrected  $P = 1.6 \times 10^{-7}$ ,  $Perm P = 0.001$ ) whose functions are unknown.

The first significantly associated SNP (chromosome 24: 36,399,705) resides in intron 78 of *SLC9A8*, an integral transmembrane protein that exchanges extracellular  $\text{Na}^+$  for intracellular  $\text{H}^+$ . *SLC9A8* serves multiple functions, including intracellular pH homeostasis, cell volume regulation, and electroneutral NaCl absorption in epithelia (Xu et al. 2008). Knockout male mice have impaired luteinizing hormone-stimulated cAMP production and are infertile, despite normal morphology of their reproductive system and normal behavior (Xu et al. 2015). *SLC9A8* is expressed ubiquitously (Figure 2) (Uhlén et al. 2015), an expression pattern suggestive of involvement in housekeeping functions.

The second SNP (chromosome 20: 35,206,774) is found in the intron between exons 26 and 27 of *CACNA2D3*. This gene is one of four members of the alpha-2/delta subunit three family of the voltage-dependent calcium ( $\text{Ca}^{2+}$ ) channel complex, regulating the influx of  $\text{Ca}^{2+}$  ions entering the cell upon membrane polarization (Jin et al. 2017). The regulation of calcium is a fundamental process relevant to life at fertilization, and subsequent control of development and differentiation of cells (Berridge et al. 1998). In previous studies in humans, *CACNA2D3* is differentially methylated in the amnion between normal and preeclamptic pregnancies (Suzuki et al. 2016) and in blood between extreme preterm and term infants at birth (Cruickshank et al. 2013, Eidem et al. 2015). Additionally, *CACNA2D3* is one of four genes recently described as influencing cranial morphology in human

populations (Paternoster et al. 2012). In other domesticated animals, *CACNA2D3* is downregulated by Colony Stimulating Factor 2 (*CSF2*) in the trophoectoderm of pregnant cattle, which increases the ability of the preimplantation embryo to advance to the blastocyst stage (Ozawa et al. 2016). In the closely related wolf, *CACNA2D3* is under diversifying selection associated with environmental adaptations to altitude (Pilot et al. 2014, Schweizer et al. 2016, Zhang et al. 2014).

The third significantly associated SNP (chromosome 25: 10,481,606) falls in a large intronic region of the *MTUS2* gene. The protein product of *MTUS2* is cardiac zipper protein (CAZIP), a member of a class of proteins that interact with angiotensin II receptor interacting proteins (ATIP) (Rodrigues-Ferreira et al. 2010). *MTUS2* plays a role in the development and function of the heart and nervous system in vertebrates (Puy et al. 2009).

The fourth SNP (chromosome 6: 57,457,184) is located in the 3' intron of *HFM1*, a DNA helicase that confers genome integrity in germline tissues (Tanaka et al. 2009). *HMF1* plays a role in meiotic recombination implying a major evolutionary role through the creation of diverse offspring. In mice, deletion of *HFM1* eliminates a major fraction of cross over events (Guiraldelli et al. 2013), whereas in cattle *HMF1* is associated with both fertility and milk production in Holstein cattle (Pimentel et al. 2011), as well as with alteration of global recombination rates in Holstein, Holstein-Friesian, Jersey, and crossbred individuals (Kadri et al. 2016).

## **Discussion**

Mammals exhibit a great deal of variation in their reproductive traits, yet remarkably little is known about the genetic basis of these traits. To begin to address this, we used GWAS analyses to examine the genetic basis of four reproductive traits (cesarean section rate, stillbirth rate, litter size, and gestation length) across up to 97 domestic dog breeds. We identified several significant genetic associations for each trait (Figure 1).

Five of the 13 genetic variants that we found to be associated with reproductive trait variation have been previously identified to be involved in diverse traits associated with dog domestication (Table 2), such as brachycephaly and coat curl and color, suggesting that selection for signature traits of dog breeds may have also directly or indirectly influenced variation in reproductive traits. For example, one of the variants that we found to be associated with cesarean section rate is in an intron of *SMOC2*, a gene previously associated with brachycephaly in dogs (Bannasch et al. 2010, Marchant et al. 2017). Brachycephaly, the shortening and widening of the muzzle and skull, is present in several “fighting” breeds such as Boxer, Boston Terrier, and Bulldog, and is thought to have been originally artificially selected on the basis that a shorter and wider cranial shape would enhance the dog’s biting power (Ellis et al. 2009). Interestingly, one of the traits that associated with brachycephaly is cephalopelvic disproportion (Evans and Adams 2010), a significant medical condition that can result in the death of both the litter and the bitch due to the inability of the pups to pass through the pelvic canal. The negative effects of cephalopelvic disproportion are alleviated by cesarean section, which not only allows these breeds to reproduce but also enables the continued application of artificial selection for the most extreme cranial morphology (Bannasch et al. 2010). Whether the *SMOC2* variant identified

directly influences parturition and birth timing in dogs (in humans, *SMOC2* is highly expressed in several reproductive tissues; see Figure 2 and Ref. (Uhlén et al. 2015) or indirectly leads to adverse pregnancy outcomes (e.g. brachycephalic cranial morphology leading to cesarean section) remains unknown. It is highly likely, however, that the association between *SMOC2* and brachycephaly came first, paving the way for the subsequent association of both with cesarean section rate.

Several of the significantly associated genes that we identified in dogs appear to also be associated with reproductive phenotypes in humans. This suggests the possibility that the artificial selection that gave rise to dog breeds may have also contributed to the observed variation in their reproductive traits. For example, a member of the gene family for a subunit of the voltage-dependent calcium channel complex, *CACNA2D3*, which is associated with gestation length in our study, has been shown to be both differentially methylated in amnion between normal and preeclamptic human pregnancies (Suzuki et al. 2016), and in blood between extreme preterm and term infants at birth (Cruickshank et al. 2013, Eidem et al. 2015). Furthermore, expression of *MSRB3*, which is associated with litter size in our study, is elevated in ripe (at term) versus unripe human uterine cervix and may be involved in the onset of labor (Hassan et al. 2009). Finally, a few of the other genes significantly or marginally associated with reproductive traits (*SMOC2* and *MITF*) are also known to be expressed in human reproductive tissues (Uhlén et al. 2015)(Figure 2).

## Methods

**Genotypic and Phenotypic Data.** To identify SNPs that are significantly associated with reproductive traits, we used a previously published data set containing 160,727 SNPs from 4,342 individual dogs across 162 breeds genotyped using the Illumina 173k CanineHD array that were downloaded from <http://datadryad.org/resource/doi:10.5061/dryad.266k4> (Hayward et al. 2016).

Following the original authors, SNPs with a genotyping rate (i.e., the proportion of genotypes per marker with non-missing data) below 95% and heterozygosity ratios (i.e., the ratio of the number of heterozygous SNPs divided by the number of non-reference homozygous SNPs) below 0.25 or above 1.0 were removed.

Phenotypic reproductive trait data for litter size (number of pups), cesarean rate, stillbirth rate, and gestation length across 128 breeds were collected from a variety of breeder's handbook and primary journal articles (Borge et al. 2011, Tønnessen et al. 2012, Evans and Adams 2010, Chatdarong et al. 2007, Concannon et al. 1983, Elits et al. 2005, Evans and White 1997, Gavrilovic et al. 2008, Okkens et al. 1993, Son et al. 2001, Kim et al. 2007, Linde-Forsberg et al.) (see also Supplementary File 1). We also included body mass as a control trait. Each breed was assigned the average breed value for each phenotype; the full list of the values for all four reproductive traits and body mass across the 128 breeds is provided in supplementary table 1. For the body mass control, our collected trait values overlapped with the genotypic data (Hayward et al. 2016) for 101 breeds corresponding to 3,384 individuals (Table 1). For the reproductive traits, our collected cesarean section rate trait values overlapped with the genotypic data for 95 breeds (3,194 individuals), our litter size trait values for 60 breeds (2,617 individuals), our stillbirth rate values for 56 breeds



(2,590 individuals), and our gestation length values for 23 breeds (1,908 individuals) (Table 1).

**Genome Wide Association (GWAS) Analyses.** To test SNPs for associations with the four reproductive traits of interest, we conducted a GWAS analysis for each individual trait using body mass as a covariate, and accounting for kinship, as well as for body mass as a proof of concept. All GWAS analyses were run using a linear-mixed model as implemented in the program GEMMA, version 0.94 (Zhou and Stephens 2012). Numerous studies have shown that the vast majority of morphological, ecological and physiological traits vary as a function of an organism's body mass (Gould 1966, Kleiber 1932, Shingleton 2010) as well as a function of kinship (Hayward et al. 2016, Boyko et al. 2010). Most notably for the purpose of this study, body mass has been previously shown to be strongly correlated with litter weight (Sacher and Staffeldt 1974, Blueweiss et al. 1978, Tuomi 1980), neonate weight (Sacher and Staffeldt 1974, Blueweiss et al. 1978, Tuomi 1980, Ross 1988), and gestation length (Martin et al. 1985, Sacher and Staffeldt 1974, Blueweiss et al. 1978, Kihlström 1972, Phillips et al. 2015).

To ensure our analysis reflected the reproductive trait of interest and not SNPs associated with body mass, we used log body mass as a covariate for all reproductive trait analyses. To be able to do so, we pruned our genotypic data so that they included only dog breeds (and individuals) for which we had both body mass and reproductive trait of interest values (see Supplementary Table 1).

To account for population stratification, we calculated a kinship matrix of the included breeds using GEMMA and included it as a random effect in each association analysis. Each value of a kinship matrix describes the probability that a particular allele from two randomly chosen individuals at a given locus is identical by descent (Lange 2002). Finally, to control for inflated  $P$  value significance from the testing of multiple hypotheses, we used a significance threshold of  $P = 4.3 \times 10^{-7}$  (Bonferroni cutoff of  $\alpha = 0.05$ ,  $N = 115,574$ ) for all analyses. All reported  $P$  values are Wald's  $P$  values as calculated in GEMMA (Zhou and Stephens 2012).

To reduce potential error stemming from SNP misidentification in our analyses, we included only SNPs with a minor allele frequency (MAF)  $> 0.05$ , since SNPs with very low minor allele frequencies are more prone to error due to the small number of samples that have the called nucleotide. Furthermore, we pruned SNPs not in complete or near-complete linkage disequilibrium using a variance inflation factor of 10, using the PLINK command `--indep 100 10 10` (Purcell et al. 2007).

Finally, to validate variants significantly associated with at least one reproductive life history trait in the domestic dog, we performed a permutation analysis. For each trait, we randomly permuted the assignment of breed-specific phenotypes while holding body mass constant for each breed across 1,000 permutations. We then regressed the randomly assigned reproductive phenotypes onto log body mass and assigned the residual for each breed as the phenotype for all of the individuals of that breed. Next, using GEMMA (Zhou and Stephens 2012), we performed an association test for each variant to obtain a single

permuted p-value. The permutation p-value in Table 2 corresponds to the number of times that a single permuted p-value was less than the empirical p-value from the original analysis. Any variant with a permutation p-value greater than 0.05 was acknowledged as a potential false positive association.

To gain insight into the genetic elements putatively involved with the traits of interest, we mapped all SNPs found to be significantly and marginally associated with each trait of interest using custom perl and R scripts to the CanFam3.1.87 dog genome assembly (Lindblad-Toh et al. 2005, Hoepfner et al. 2014). Transcript IDs were mapped to gene names using bioconductor biomaRt interface to the ENSEMBL biomart (Durinck et al. 2009). If the significant SNP was outside gene boundaries, we reported the nearest upstream or downstream gene. Manhattan plots and quantile-quantile plots were generated using R 3.1.2 (R Core Team 2013) with the qqman package (Turner 2014). Calculation of the  $\lambda$  inflation parameter, a metric of any existing systematic bias in the data set, was calculated using the GenABEL R package (Aulchenko 2007) and was used to interpret Type I error rate in the multiple testing of GWAS analyses (Rao et al. 2016).

## **Acknowledgements**

We thank members of the Rokas lab and members of the March of Dimes Prematurity Research Center Ohio Collaborative for useful discussions of this work.

## **Funding Statement**

This research was supported by the March of Dimes through the March of Dimes Prematurity Research Center Ohio Collaborative (to A.R., P.A. and J.A.C) and by the Burroughs Wellcome Fund (to J.A.C and A.R.). MLJ received partial support through a Littlejohn Summer Research Scholarship at Vanderbilt University. The funders had no role in study design, data collection and analysis, decision to publish, or preparation of the manuscript.

## TABLES

**Table 1.** Numbers of breeds and individuals with overlapping phenotypes and genotypes included in our analysis.

| Trait                 | Number of Overlapping Breeds | Number of Overlapping Individuals |
|-----------------------|------------------------------|-----------------------------------|
| Body Mass             | 101                          | 3,384                             |
| Cesarean Section Rate | 97                           | 3,194                             |
| Litter Size           | 60                           | 2,617                             |
| Stillbirth Rate       | 57                           | 2,590                             |
| Gestation Length      | 23                           | 1,908                             |

1 **Table 2. Summary of genes that contain or are adjacent to the SNPs that are associated with variation in reproductive**  
 2 **traits across dog breeds.**

| Gene ID      | Gene Name                               | Chr | rs Number  | Variant                       | Domestication-related Trait(s) | Reproductive Trait(s)                                   | Empirical p-value                                                          | Permutation p-value     |
|--------------|-----------------------------------------|-----|------------|-------------------------------|--------------------------------|---------------------------------------------------------|----------------------------------------------------------------------------|-------------------------|
| <i>SMOC2</i> | SPARC related modular calcium binding 2 | 1   | rs21966904 | Non-coding (Intron 13)        | Brachycephaly (Dogs)           | Cesarean section rate                                   | 2.0 x 10 <sup>-7</sup>                                                     | 0.011                   |
| <i>PALM3</i> | paralemmin 3                            | 20  | rs22853767 | Non-coding (3' UTR)           | -                              | Cesarean section rate                                   | 1.4 x 10 <sup>-9</sup>                                                     | 0.001                   |
| <i>KRT71</i> | keratin                                 | 27  | rs23373415 | Coding (exon 2)               | Coat phenotypes (Dogs)         | Cesarean section rate<br>Litter size<br>Stillbirth rate | 2.9 x 10 <sup>-7</sup><br>2.2 x 10 <sup>-8</sup><br>3.2 x 10 <sup>-9</sup> | 0.217<br>0.017<br>0.064 |
| <i>CD36</i>  | CD36 glycoprotein                       | 18  | rs22664051 | Intergenic variant (downstrea | -                              | Cesarean section rate                                   | 9.7 x 10 <sup>-8</sup>                                                     | 0.024                   |

|                |                                               |    |            |                                 |                          |                                |                                              |                |
|----------------|-----------------------------------------------|----|------------|---------------------------------|--------------------------|--------------------------------|----------------------------------------------|----------------|
|                |                                               |    |            | m)                              |                          |                                |                                              |                |
| <i>RCL1</i>    | RNA terminal phosphate cyclase like 1         | 1  | rs21894066 | Non-coding (Intron 7)           | -                        | Litter size                    | $2.6 \times 10^{-8}$                         | 0.001          |
| <i>MITF</i>    | melanogenesis associated transcription factor | 20 | 21848176   | Coding (exon 5)                 | Coat color (Dogs)        | Litter size<br>Stillbirth rate | $3.5 \times 10^{-7}$<br>$1.4 \times 10^{-7}$ | 0.079<br>0.091 |
| <i>MSRB3</i>   | methionine sulfoxide reductase B3             | 10 | rs22060533 | Intergenic variant (downstream) | Ear erectness (Dogs)     | Litter size                    | $1.3 \times 10^{-7}$                         | 0.001          |
| <i>MSANTD1</i> | Myb/SANT DNA binding domain containing        | 6  | rs9084938  | Intergenic variant (downstream) | Black coat color (Goats) | Litter size                    | $1.5 \times 10^{-9}$                         | 0.001          |

|                 |                                                                              |    |            |                          |                                       |                  |                       |       |
|-----------------|------------------------------------------------------------------------------|----|------------|--------------------------|---------------------------------------|------------------|-----------------------|-------|
| <i>SP140</i>    | nuclear protein<br>body SP140                                                | 25 | rs8856304  | Non-coding<br>(intron 4) | -                                     | Stillbirth rate  | $2.8 \times 10^{-8}$  | 0.001 |
| <i>HTR2C</i>    | 5-<br>hydroxytrypta<br>mine receptor<br>2                                    | X  | rs24622199 | Non-Coding<br>(intron 2) | Tameness (Dogs,<br>Foxes, Mice)       | Stillbirth rate  | $2.0 \times 10^{-7}$  | 0.001 |
| <i>SLC9A8</i>   | solute carrier<br>family 9<br>member A8                                      | 24 | rs23219089 | Non-coding<br>(intron 7) | -                                     | Gestation length | $3.7 \times 10^{-11}$ | 0.001 |
| <i>CACNA2D3</i> | calcium<br>voltage-gated<br>channel<br>auxiliary<br>subunit<br>alpha2delta 3 | 20 | rs22853845 | Non-coding<br>(intron 9) | Blastocyst<br>development<br>(Cattle) | Gestation length | $3.1 \times 10^{-7}$  | 0.013 |
| <i>MTUS2</i>    | microtubule                                                                  | 25 | 10481606   | Non-coding               | -                                     | Gestation length | $3.6 \times 10^{-7}$  | 0.001 |



|             |                                                  |   |            |                          |                                              |                  |                      |       |
|-------------|--------------------------------------------------|---|------------|--------------------------|----------------------------------------------|------------------|----------------------|-------|
|             | associated<br>tumor<br>suppressor<br>candidate 2 |   |            | (intron 6)               |                                              |                  |                      |       |
| <i>HFM1</i> | ATP dependent<br>DNA helicase<br>homolog         | 6 | rs24306896 | Non-coding<br>(intron 4) | Fertility and<br>milk production<br>(Cattle) | Gestation length | $4.0 \times 10^{-7}$ | 0.013 |

### 3 **Figure Legends**

4

#### 5 **Figure 1. Genome Wide Association results for reproductive traits in domestic dogs.**

6 Manhattan plots showing the statistical significance of each SNP as a function of genomic  
7 position for (A) cesarean section rate (n = 3,194 individuals, n = 97 breeds), (B) litter size  
8 (n = 2,617 individuals, n = 60 breeds), (C) stillbirth (n = 2,590 individuals, n = 57 breeds),  
9 and (D) gestation length (n = 1,908 individuals, n = 23 breeds). Horizontal line indicates the  
10 significance threshold at  $P = 4.3 \times 10^{-7}$ . Significant SNPs are labels with the intersecting  
11 or nearest gene. Significant SNPs whose permutation p-values were above the 0.05  
12 threshold are indicated by an asterisk (\*). Plots were generated in R using the qqman  
13 package.

14

#### 15 **Figure 2. Gene expression in human female reproductive tissues of genes that** 16 **contain or are adjacent to SNPs associated with reproductive traits in domestic dogs.**

17 Raw data were obtained from the Human Protein Atlas database (42).

18

19 **Supplementary Material**

20

21 **Supplementary Figure 1. Recapitulation of SNPs associated with body mass in 101**

22 **domesticated dog breeds.** (A) Body mass distribution for 101 breeds. (B) Manhattan plots

23 showing the statistical significance of each SNP as a function of genomic position for body

24 mass. Plot generated in R using the qqman package. (C) Quantile-quantile plot showing the

25 effectiveness of the stratification correction ( $\lambda = 1.17$ ). Plot generated in R; inflation factor

26 was calculated using the GenABEL package implemented in R.

27

28 **Supplementary Figure 2. Distribution of phenotypic values of the four reproductive**

29 **traits examined in this study across dog breeds.** (A) cesarean section rate ( $n = 97$

30 breeds), (B) litter size ( $n = 60$  breeds), (C) stillbirth rate ( $n = 57$  breeds), and (D) gestation

31 length ( $n = 23$  breeds). Plots were generated in R using the ggplot2 package.

32

33 **Supplementary Figure 3. Quantile-quantile plots for the GWAS analyses of the four**

34 **reproductive traits.** The range for the inflation factor ( $\lambda$ ) for all GWAS analyses is between

35 1.05 – 1.09, indicating the effectiveness of the stratification correction. (A) cesarean section

36 rate ( $\lambda = 1.05$ ), (B) litter size ( $\lambda = 1.05$ ), (C) stillbirth rate ( $\lambda = 1.05$ ), and (D) gestation

37 length ( $\lambda = 1.09$ ). Plots generated in R, and inflation factors were calculated using the

38 GenABEL package implanted in R.

39

40 **Supplementary Table 1. Summary of raw phenotypes for breeds included in analysis.**

41

42 **Supplementary Table 2. Summary of top 100 SNPs associated with body mass.**

43

44 **Supplementary Table 3. Summary of top 100 SNPs associated with cesarean section**  
45 **rate.**

46

47 **Supplementary Table 4. Summary of top 100 SNPs associated with litter size.**

48

49 **Supplementary Table 5. Summary of top 100 SNPs associated with stillbirth rate.**

50

51 **Supplementary Table 6. Summary of top 100 SNPs associated with gestation length.**

52

53 **Supplementary File 1. Sources of phenotypic data.**

54

## 55 References

- 56 Ahmed ZM, Yousaf R, Lee BC, Khan SN, Lee S, Lee K, et al. Functional null mutations of  
57 MSRB3 encoding methionine sulfoxide reductase are associated with human  
58 deafness DFNB74. *Am J Hum Genet.* 2011 Jan 7;88(1):19–29.  
59
- 60 Amin N, de Vrij FMS, Baghdadi M, Brouwer RWW, van Rooij JGJ, Jovanova O, et al. A rare  
61 missense variant in RCL1 segregates with depression in extended families.  
62 *Molecular Psychiatry.* Nature Publishing Group; 2017 Mar 21;58:1323.  
63
- 64 Aulchenko YS, Ripke S, Isaacs A, van Duijn CM. GenABEL: an R library for genome-wide  
65 association analysis. *Bioinformatics.* Oxford University Press; 2007 May  
66 15;23(10):1294–6.  
67
- 68 Bagnicka E, Wallin E, Łukaszewicz M, Ådnøy T. Heritability for reproduction traits in Polish  
69 and Norwegian populations of dairy goat. *Small Ruminant Research.* 2007  
70 Apr;68(3):256–62.  
71
- 72 Bannasch D, Young A, Myers J, Truvé K, Dickinson P, Gregg J, et al. Localization of Canine  
73 Brachycephaly Using an Across Breed Mapping Approach. Fairhead C, editor. *PLoS*  
74 *ONE.* Public Library of Science; 2010 Mar 10;5(3):e9632.  
75
- 76 Basile M, Lin R, Kabbani N, Karpa K, Kilimann M, Simpson I, et al. Paralemmin interacts with  
77 D3 dopamine receptors: implications for membrane localization and cAMP  
78 signaling. *Arch Biochem Biophys.* 2006 Feb 1;446(1):60–8.  
79
- 80 Beale H, Ostrander EA. Sizing up dogs. *Current Biology.* Elsevier; 2012 May 8;22(9):R315–  
81 6.  
82
- 83 Behringer RR, Eakin GS, Renfree MB. Mammalian diversity: gametes, embryos and  
84 reproduction. *Reprod Fertil Dev.* 2006;18(2):99–9.  
85
- 86 Benjelloun B, Alberto FJ, Streeter I, Boyer F, Coissac E, Stucki S, et al. Characterizing neutral  
87 genomic diversity and selection signatures in indigenous populations of Moroccan  
88 goats (*Capra hircus*) using WGS data. *Front Genet.* Frontiers Media SA; 2015;6:4447.  
89
- 90 Berridge MJ, Bootman MD, Lipp P. Calcium--a life and death signal. *Nature.* 1998 Oct  
91 15;393(6682):645–8.  
92
- 93 Bloch DB, la Monte de SM, Guigaouri P, Filippov A, Bloch KD. Identification and  
94 characterization of a leukocyte-specific component of the nuclear body. *J Biol Chem.*  
95 1996 Nov 15;271(46):29198–204.  
96
- 97 Blueweiss L, Fox H, Kudzma V, Nakashima D, Peters R, Sams S. Relationships between body  
98 size and some life history parameters. *Oecologia.* Springer; 1978;37(2):257–72.  
99

- 100 Bolormaa S, Pryce JE, Hayes BJ, Goddard ME. Multivariate analysis of a genome-wide  
101 association study in dairy cattle. *Journal of Dairy Science*. Elsevier; 2010 Aug  
102 1;93(8):3818–33.  
103
- 104 Borge KS, Tønnessen R, Nødtvedt A, Indrebø A. Litter size at birth in purebred dogs--a  
105 retrospective study of 224 breeds. *Theriogenology*. 2011 Mar 15;75(5):911–9.  
106
- 107 Boyko AR, Quignon P, Li L, Schoenebeck JJ, Degenhardt JD, Lohmueller KE, et al. A Simple  
108 Genetic Architecture Underlies Morphological Variation in Dogs. Hoekstra HE,  
109 editor. *Plos Biol. Public Library of Science*; 2010 Aug 10;8(8):e1000451.  
110
- 111 Brot N, Weissbach L, Werth J, Weissbach H. Enzymatic reduction of protein-bound  
112 methionine sulfoxide. *Proc Natl Acad Sci USA. National Academy of Sciences*; 1981  
113 Apr;78(4):2155–8.  
114
- 115 Burriss MJ, Blunn CT. Some factors affecting gestation length and birth weight of beef cattle.  
116 *J Anim Sci. American Society of Animal Science*; 1952;11(1):34–41.  
117
- 118 Carneiro M, Piorno V, Rubin C-J, Alves JM, Ferrand N, Alves PC, et al. Candidate genes  
119 underlying heritable differences in reproductive seasonality between wild and  
120 domestic rabbits. *Animal Genetics*. 2015 May 22;46(4):418–25.  
121
- 122 Carreira S, Goodall J, Denat L, Rodriguez M, Nuciforo P, Hoek KS, et al. Mitf regulation of  
123 *Dia1* controls melanoma proliferation and invasiveness. *Genes Dev*. 2006 Dec  
124 15;20(24):3426–39.  
125
- 126 Cassady JP, Johnson RK, Pomp D, Rohrer GA, Van Vleck LD, Spiegel EK, et al. Identification  
127 of quantitative trait loci affecting reproduction in pigs. *J Anim Sci*. 2001  
128 Mar;79(3):623–33.  
129
- 130 Chatdarong K, Tummaruk P, Sirivaidyapong S, Raksil S. Seasonal and breed effects on  
131 reproductive parameters in bitches in the tropics: a retrospective study. *J Small  
132 Anim Pract. Blackwell Publishing Ltd*; 2007 Aug;48(8):444–8.  
133
- 134 Chen X, Wu X, Zhao Y, Wang G, Feng J, Li Q, et al. A novel binding protein of single  
135 immunoglobulin IL-1 receptor-related molecule: Paralemmin-3. *Biochem Biophys  
136 Res Commun*. 2011 Jan 28;404(4):1029–33.  
137
- 138 Concannon P, Whaley S, Lein D, Wissler R. Canine gestation length: variation related to time  
139 of mating and fertile life of sperm. *Am J Vet Res*. 1983 Oct;44(10):1819–21.  
140
- 141 Cross JC, Werb Z, Fisher SJ. Implantation and the placenta: key pieces of the development  
142 puzzle. *Science*. 1994 Dec 2;266(5190):1508–18.  
143

- 144 Cross JF, Martin RD. Calculation of gestation period and other reproductive parameters for  
145 primates. Dodo: Journal of the Jersey Wildlife Preservation Trust. Durrell Wildlife  
146 Conservation Trust; 1981;18:30–43.  
147
- 148 Cruickshank MN, Oshlack A, Theda C, Davis PG, Martino D, Sheehan P, et al. Analysis of  
149 epigenetic changes in survivors of preterm birth reveals the effect of gestational age  
150 and evidence for a long term legacy. *Genome Med. BioMed Central*; 2013;5(10):96.  
151
- 152 Davies Morel MCG, Newcombe JR, Holland SJ. Factors affecting gestation length in the  
153 Thoroughbred mare. *Animal Reproduction Science*. 2002 Dec 16;74(3-4):175–85.  
154
- 155 Derrickson, E. M. "Comparative reproductive strategies of altricial and precocial eutherian  
156 mammals." *Functional Ecology* (1992): 57-65.  
157
- 158 Drago A, Serretti A. Focus on HTR2C: A possible suggestion for genetic studies of complex  
159 disorders. *American Journal of Medical Genetics Part B: Neuropsychiatric Genetics*.  
160 Wiley Subscription Services, Inc., A Wiley Company; 2009 Jul 5;150B(5):601–37.  
161
- 162 Dufour DL, Sauter ML. Comparative and evolutionary dimensions of the energetics of  
163 human pregnancy and lactation. *Am J Hum Biol. Wiley-Blackwell*; 2002 Aug  
164 21;14(5):584–602.  
165
- 166 Durinck S, Spellman PT, Birney E, Huber W. Mapping identifiers for the integration of  
167 genomic datasets with the R/Bioconductor package biomaRt. *Nat Protoc*.  
168 2009;4(8):1184–91.  
169
- 170 Eidem HR, Ackerman WE, McGary KL, Abbot P, Rokas A. Gestational tissue transcriptomics  
171 in term and preterm human pregnancies: a systematic review and meta-analysis.  
172 *BMC Med Genomics. BioMed Central*; 2015 Jun 5;8(1):27.  
173
- 174 Eilts BE, Davidson AP, Hosgood G, Paccamonti DL, Baker DG. Factors affecting gestation  
175 duration in the bitch. *Theriogenology*. 2005 Jul;64(2):242–51.  
176
- 177 Elliot MG, Crespi BJ. Phylogenetic Evidence for Early Hemochorial Placentation in Eutheria.  
178 *Placenta. Elsevier Ltd*; 2009 Nov 1;30(11):949–67.  
179
- 180 Ellis JL, Thomason J, Kebreab E, Zubair K, France J. Cranial dimensions and forces of biting  
181 in the domestic dog. *J Anat. Blackwell Publishing Ltd*; 2009 Mar 1;214(3):362–73.  
182
- 183 Elovitz MA, Brown AG, Anton L, Gilstrap M, Heiser L, Bastek J. Distinct cervical microRNA  
184 profiles are present in women destined to have a preterm birth. *Am J Obstet  
185 Gynecol. Elsevier*; 2014 Mar 1;210(3):221.e1–221.e11.  
186
- 187 Enders AC, Carter AM. What Can Comparative Studies of Placental Structure Tell Us?—A  
188 Review. *Placenta*. 2004 Apr;25:S3–S9.  
189

- 190 Evans KM, Adams VJ. Proportion of litters of purebred dogs born by caesarean section. *J*  
191 *Small Anim Pract.* Blackwell Publishing Ltd; 2010 Feb;51(2):113–8.  
192
- 193 Evans JM, White K. *The Book of the Bitch.* Interpet; 1997. 1 p  
194
- 195 Febbraio M, Hajjar DP, Silverstein RL. CD36: a class B scavenger receptor involved in  
196 angiogenesis, atherosclerosis, inflammation, and lipid metabolism. *J Clin Invest.*  
197 *American Society for Clinical Investigation*; 2001 Sep;108(6):785–91.  
198
- 199 Gavrilovic BB, Andersson K, Linde Forsberg C. Reproductive patterns in the domestic dog—  
200 A retrospective study of the Drever breed. *Theriogenology.* 2008 Sep;70(5):783–94.  
201
- 202 Guiraldelli MF, Eyster C, Wilkerson JL, Dresser ME, Pezza RJ. Mouse HFM1/Mer3 is required  
203 for crossover formation and complete synapsis of homologous chromosomes during  
204 meiosis. Hawley RS, editor. *PLoS Genetics.* Public Library of Science; 2013  
205 Mar;9(3):e1003383.  
206
- 207 Gould SJ. Allometry and size in ontogeny and phylogeny. *Biol Rev Camb Philos Soc.* 1966  
208 Nov;41(4):587–640.  
209
- 210 Hassan SS, Romero R, Tarca AL, Nhan-Chang C-L, Vaisbuch E, Erez O, et al. The  
211 transcriptome of cervical ripening in human pregnancy before the onset of labor at  
212 term: identification of novel molecular functions involved in this process. *J Matern*  
213 *Fetal Neonatal Med.* 2009 Dec;22(12):1183–93.  
214
- 215 Harrison RM. *Reproduction in Mammals: General Overview.* Chichester, UK: John Wiley &  
216 Sons, Ltd; 2001.  
217
- 218 Hayward JJ, Castelhana MG, Oliveira KC, Corey E, Balkman C, Baxter TL, et al. Complex  
219 disease and phenotype mapping in the domestic dog. *Nature Communications.*  
220 *Nature Publishing Group*; 1AD;7:1–11.  
221
- 222 Hoepfner MP, Lundquist A, Pirun M, Meadows JRS, Zamani N, Johnson J, et al. An Improved  
223 Canine Genome and a Comprehensive Catalogue of Coding Genes and Non-Coding  
224 Transcripts. Chadwick BP, editor. *PLoS ONE.* Public Library of Science; 2014 Mar  
225 13;9(3):e91172.  
226
- 227 Horikoshi M, Beaumont RN, Day FR, Warrington NM, Kooijman MN, Fernandez-Tajes J, et al.  
228 Genome-wide associations for birth weight and correlations with adult disease.  
229 *Nature.* 2016 Sep 28;538(7624):248–52.  
230
- 231 Hudson R, Cruz Y, Lucio A, Ninomiya J, Martínez-Gómez M. Temporal and behavioral  
232 patterning of parturition in rabbits and rats. *Physiol Behav.* 1999 Jun;66(4):599–  
233 604.  
234



- 235 Jin Y, Cui D, Ren J, Wang K, Zeng T, Gao L. CACNA2D3 is downregulated in gliomas and  
236 functions as a tumor suppressor. *Mol Carcinog.* 2017 Mar;56(3):945–59.  
237
- 238 Johanson JM, Berger PJ, Tsuruta S, Misztal I. A Bayesian threshold-linear model evaluation  
239 of perinatal mortality, dystocia, birth weight, and gestation length in a Holstein herd.  
240 *Journal of Dairy Science.* 2011 Jan;94(1):450–60.  
241
- 242 Jones KE, Bielby J, Cardillo M, Fritz SA, O'Dell J, Orme CDL, et al. PanTHERIA: a species-level  
243 database of life history, ecology, and geography of extant and recently extinct  
244 mammals. *Ecology.* Ecological Society of America; 2009;90(9):2648.  
245
- 246 Kadri NK, Harland C, Faux P, Cambisano N, Karim L, Coppieters W, et al. Coding and  
247 noncoding variants in HFM1, MLH3, MSH4, MSH5, RNF212, and RNF212B affect  
248 recombination rate in cattle. *Genome Research.* Cold Spring Harbor Lab; 2016  
249 Oct;26(10):1323–32.  
250
- 251 Karlsson EK, Lindblad-Toh K. Leader of the pack: gene mapping in dogs and other model  
252 organisms. Nature Publishing Group. Nature Publishing Group; 2008 Sep;9(9):713–  
253 25  
254
- 255 Kihlström JE. Period of Gestation and Body-Weight in Some Placental Mammals. *Comp*  
256 *Biochem Physiol.* 1972;43(NA3):673–&.  
257
- 258 Kiltie RA. Intraspecific Variation in the Mammalian Gestation Period. *Journal of*  
259 *Mammalogy.* 1982;63(4):646–52.  
260
- 261 Kim BS, Son CH. Time of initial detection of fetal and extra-fetal structures by  
262 ultrasonographic examination in Miniature Schnauzer bitches. *J Vet Sci. The Korean*  
263 *Society of Veterinary Science;* 2007 Sep;8(3):289–93.  
264
- 265 Kim H-Y, Gladyshev VN. Characterization of mouse endoplasmic reticulum methionine-R-  
266 sulfoxide reductase. *Biochem Biophys Res Commun.* 2004 Aug 6;320(4):1277–83.  
267
- 268 Kleiber M. Body size and metabolism. *Hilgardia.* 1932 Jan;6(January):315–53.  
269
- 270 Kukekova AV, Johnson JL, Teiling C, Li L, Oskina IN, Kharlamova AV, et al. Sequence  
271 comparison of prefrontal cortical brain transcriptome from a tame and an  
272 aggressive silver fox (*Vulpes vulpes*). *BMC Genomics.* Third. BioMed Central; 2011  
273 Oct 3;12(1):482.  
274
- 275 Lamm KYB, Johnson ML, Baker Phillips J, Muntifering MB, James JM, Jones HN, et al.  
276 Inverted formin 2 regulates intracellular trafficking, placentation, and pregnancy  
277 outcome. *Elife.* eLife Sciences Publications Limited; 2018 Jan 8;7:742.  
278
- 279 Lange K. *Mathematical and Statistical Methods for Genetic Analysis.* New York, NY: Springer  
280 Science & Business Media; 2002. 1 p.

- 281  
282 Langlois B, Blouin C, Chaffaux S. Analysis of several factors of variation of gestation loss in  
283 breeding mares. *Animal*. 2012 Aug 9;6(12):1925–30.  
284
- 285 Lartey J, Smith M, Pawade J, Strachan B, Mellor H, Bernal AL. Up-Regulation of Myometrial  
286 RHO Effector Proteins (PKN1 and DIAPH1) and CPI-17 (PPP1R14A)  
287 Phosphorylation in Human Pregnancy Is Associated with Increased GTP-RHOA in  
288 Spontaneous Preterm Labor. *Biol Reprod*. Oxford University Press; 2007 Jun  
289 1;76(6):971–82.  
290
- 291 Lee H, Jaffe AE, Feinberg JI, Tryggvadottir R, Brown S, Montano C, et al. DNA methylation  
292 shows genome-wide association of NFIX, RAPGEF2 and MSRB3 with gestational age  
293 at birth. *International Journal of Epidemiology*. 2012 Feb;41(1):188–99.  
294
- 295 Lefèvre CM, Sharp JA, Nicholas KR. Evolution of Lactation: Ancient Origin and Extreme  
296 Adaptations of the Lactation System. [http://dxdoiorg/101146/annurev-genom-](http://dxdoiorg/101146/annurev-genom-082509-141806)  
297 [082509-141806](http://dxdoiorg/101146/annurev-genom-082509-141806). *Annual Reviews*; 2010 Sep 7;11(1):219–38.  
298
- 299 Li Y, vonHoldt BM, Reynolds A, Boyko AR, Wayne RK, Wu D-D, et al. Artificial selection on  
300 brain-expressed genes during the domestication of dog. *Molecular Biology and*  
301 *Evolution*. 2013 Aug;30(8):1867–76.  
302
- 303 Lindblad-Toh K, Wade CM, Mikkelsen TS, Karlsson EK, Jaffe DB, Kamal M, et al. Genome  
304 sequence, comparative analysis and haplotype structure of the domestic dog.  
305 *Nature*. 2005 Dec 8;438(7069):803–19.  
306
- 307 Linde Forsberg C, Wikström C, Lundeheim N. Matings by season.  
308
- 309 Lyng H, Brøvig RS, Svendsrud DH, Holm R, Kaalhus O, Knutstad K, et al. Gene expressions  
310 and copy numbers associated with metastatic phenotypes of uterine cervical cancer.  
311 *BMC Genomics*. BioMed Central; 2006 Oct 20;7(1):268.  
312
- 313 Madani N, Millette R, Platt EJ, Marin M, Kozak SL, Bloch DB, et al. Implication of the  
314 lymphocyte-specific nuclear body protein Sp140 in an innate response to human  
315 immunodeficiency virus type 1. *J Virol*. American Society for Microbiology (ASM);  
316 2002 Nov;76(21):11133–8.  
317
- 318 Maltecca C, Gray KA, Weigel KA, Cassady JP, Ashwell M. A genome-wide association study of  
319 direct gestation length in US Holstein and Italian Brown populations. *Animal*  
320 *Genetics*. 2011 May 6;42(6):585–91.  
321
- 322 Marchant TW, Johnson EJ, McTeir L, Johnson CI, Gow A, Liuti T, et al. Canine Brachycephaly  
323 Is Associated with a Retrotransposon-Mediated Missplicing of SMOC2. *Curr Biol*.  
324 Elsevier; 2017 Jun 5;27(11):1573–6.  
325

- 326 Marsden CD, Ortega-Del Vecchyo D, O'Brien DP, Taylor JF, Ramirez O, Vilà C, et al.  
327 Bottlenecks and selective sweeps during domestication have increased deleterious  
328 genetic variation in dogs. *Proc Natl Acad Sci USA*. 2016 Jan 5;113(1):152–7.  
329
- 330 Martin RD, MacLarnon AM. Gestation Period, Neonatal Size and Maternal Investment in  
331 Placental Mammals. *Nature*. 1985;313(5999):220–3.  
332
- 333 Montenegro D, Romero R, Kim SS, Tarca AL, Draghici S, Kusanovic JP, et al. Expression  
334 patterns of microRNAs in the chorioamniotic membranes: a role for microRNAs in  
335 human pregnancy and parturition. *J Pathol*. John Wiley & Sons, Ltd; 2009  
336 Jan;217(1):113–21.  
337
- 338 Neff MW, Rine J. A Fetching Model Organism. *Cell*. 2006 Jan;124(2):229–31.  
339
- 340 Okkens AC, Hekerman TWM, de Vogel JWA, van Haaften B. Influence of litter size and breed  
341 on variation in length of gestation in the dog. *Veterinary Quarterly*. 1993  
342 Dec;15(4):160–1.  
343
- 344 Ozawa M, Sakatani M, Dobbs KB, Kannampuzha-Francis J, Hansen PJ. Regulation of gene  
345 expression in the bovine blastocyst by colony stimulating factor 2. *BMC Res Notes*.  
346 BioMed Central; 2016 Apr 29;9(1):250.  
347
- 348 Parker, H. G., VonHoldt, B. M., Quignon, P., Margulies, E. H., Shao, S., Mosher, D. S., ... &  
349 Maslen, C. L. (2009). An expressed *fgf4* retrogene is associated with breed-defining  
350 chondrodysplasia in domestic dogs. *Science*, 325(5943), 995-998.  
351
- 352 Paternoster L, Zhurov AI, Toma AM, Kemp JP, St Pourcain B, Timpson NJ, et al. Genome-  
353 wide association study of three-dimensional facial morphology identifies a variant  
354 in *PAX3* associated with nasion position. *Am J Hum Genet*. 2012 Mar 9;90(3):478–  
355 85.  
356
- 357 Phillips JB, Abbot P, Rokas A. Is Preterm Birth a Human-Specific Syndrome? *Evolution,*  
358 *Medicine, and Public Health*. 2015 Jun 14  
359
- 360 Pilot M, Greco C, vonHoldt BM, Jędrzejewska B, Randi E, Jędrzejewski W, et al. Genome-  
361 wide signatures of population bottlenecks and diversifying selection in European  
362 wolves. *Heredity*. Nature Publishing Group; 2014 Apr;112(4):428–42.  
363
- 364 Pimentel ECG, Bauersachs S, Tietze M, Simianer H, Tetens J, Thaller G, et al. Exploration of  
365 relationships between production and fertility traits in dairy cattle via association  
366 studies of SNPs within candidate genes derived by expression profiling. *Animal*  
367 *Genetics*. Blackwell Publishing Ltd; 2011 Jun;42(3):251–62.  
368
- 369 Plunkett J, Doniger S, Orabona G, Morgan T, Haataja R, Hallman M, et al. An Evolutionary  
370 Genomic Approach to Identify Genes Involved in Human Birth Timing. Barsh GS,  
371 editor. *PLoS Genetics*. 2011 Apr 14;7(4):e1001365.

- 372  
373 Pond CM. The Significance of Lactation in the Evolution of Mammals. *Evolution*. 1977  
374 Mar;31(1):177–99.  
375  
376 Purcell S, Neale B, Todd-Brown K, Thomas L, Ferreira MAR, Bender D, et al. PLINK: A Tool  
377 Set for Whole-Genome Association and Population-Based Linkage Analyses. *The*  
378 *American Journal of Human Genetics*. 2007 Sep;81(3):559–75.  
379  
380 Puy Du L, Beqqali A, Monshouwer-Kloots J, Haagsman HP, Roelen BAJ, Passier R. CAZIP, a  
381 novel protein expressed in the developing heart and nervous system. *Dev Dyn*.  
382 Wiley-Liss, Inc; 2009 Nov;238(11):2903–11.  
383  
384 R Core Team. R: A Language and Environment for Statistical Computing. Vienna, Austria;  
385 2013.  
386  
387 Rao TJ, Province MA. A Framework for Interpreting Type I Error Rates from a  
388 Product-Term Model of Interaction Applied to Quantitative Traits. *Genet Epidemiol*.  
389 2016 Feb 1;40(2):144–53.  
390  
391 Rodrigues-Ferreira S, Nahmias C. An ATIPical family of angiotensin II AT2 receptor-  
392 interacting proteins. *Trends Endocrinol Metab*. 2010 Nov;21(11):684–90.  
393  
394 Rose AB. Intron-mediated regulation of gene expression. *Curr Top Microbiol Immunol*.  
395 2008;326:277–90.  
396  
397 Ross C. The intrinsic rate of natural increase and reproductive effort in primates. *Journal of*  
398 *Zoology*. Wiley Online Library; 1988;214(2):199–219.  
399  
400 Sacher GA, Staffeldt EF. Relation of gestation time to brain weight for placental mammals:  
401 implications for the theory of vertebrate growth. *Am Nat*. JSTOR; 1974;963:593–  
402 615.  
403  
404 Schierding W, O'Sullivan JM, Derraik JGB, Cutfield WS. Genes and post-term birth: late for  
405 delivery. *BMC Res Notes*. BioMed Central; 2014 Oct 14;7(1):720.  
406  
407 Schweizer RM, vonHoldt BM, Harrigan R, Knowles JC, Musiani M, Coltman D, et al. Genetic  
408 subdivision and candidate genes under selection in North American grey wolves.  
409 *Mol Ecol*. 2016 Jan;25(1):380–402.  
410  
411 Shingleton A. Allometry: the study of biological scaling. *Nature Education Knowledge*.  
412 2010;3(10):2.  
413  
414 Sironen A, Uimari P, Nagy S, Paku S, Andersson M, Vilkki J. Knobbed acrosome defect is  
415 associated with a region containing the genes STK17b and HECW2 on porcine  
416 chromosome 15. *BMC Genomics*. BioMed Central; 2010 Dec 9;11(1):699.  
417

- 418 Son CH, Jeong KA, Kim JH, Park IC, Kim SH, Lee CS. Establishment of the prediction table of  
419 parturition day with ultrasonography in small pet dogs. *J Vet Med Sci*. 2001  
420 Jul;63(7):715–21.  
421
- 422 Suzuki M, Maekawa R, Patterson NE, Reynolds DM, Calder BR, Reznik SE, et al. Amnion as a  
423 surrogate tissue reporter of the effects of maternal preeclampsia on the fetus. *Clin*  
424 *Epigenetics*. BioMed Central; 2016;8(1):67.  
425
- 426 Tanaka K, Miyamoto N, Shouguchi-Miyata J, Ikeda J-E. HFM1, the human homologue of  
427 yeast Mer3, encodes a putative DNA helicase expressed specifically in germ-line  
428 cells. *DNA Sequence*. 2009 Jul 11;17(3):242–6.  
429
- 430 Tandon NN, Kralisz U, Jamieson GA. Identification of glycoprotein IV (CD36) as a primary  
431 receptor for platelet-collagen adhesion. *J Biol Chem*. 1989 May 5;264(13):7576–83.  
432
- 433 Tønnessen R, Borge KS, Nødtvedt A, Indrebø A. Canine perinatal mortality: A cohort study  
434 of 224 breeds. *THE*. Elsevier; 2012 Jun 1;77(9):1788–801.  
435
- 436 Tuomi J. Mammalian reproductive strategies: a generalized relation of litter size to body  
437 size. *Oecologia*. Springer; 1980;45(1):39–44.  
438
- 439 Turner SD. qqman: an R package for visualizing GWAS results using Q-Q and manhattan  
440 plots. *bioRxiv*. Cold Spring Harbor Laboratory; 2014 May 14;;005165.  
441
- 442 Uhlén M, Fagerberg L, Hallström BM, Lindskog C, Oksvold P, Mardinoglu A, et al. Tissue-  
443 based map of the human proteome. *Science*. American Association for the  
444 *Advancement of Science*; 2015 Jan 23;347(6220):1260419–9.  
445
- 446 Vaysse A, Ratnakumar A, Derrien T, Axelsson E, Pielberg GR, Sigurdsson S, et al.  
447 Identification of Genomic Regions Associated with Phenotypic Variation between  
448 Dog Breeds using Selection Mapping. Akey JM, editor. *PLoS Genetics*. Public Library  
449 of Science; 2011 Oct 13;7(10):e1002316.  
450
- 451 Walker R, Gurven M, Hill K, Migliano A, Chagnon N, De Souza R, et al. Growth rates and life  
452 histories in twenty-two small-scale societies. *Am J Hum Biol*. 2006;18(3):295–311.  
453
- 454 Wang X, Liu J, Zhou G, Guo J, Yan H, Niu Y, et al. Whole-genome sequencing of eight goat  
455 populations for the detection of selection signatures underlying production and  
456 adaptive traits. *Sci Rep*. Nature Publishing Group; 2016 Dec 9;1–10.  
457
- 458 Xu H, Chen H, Dong J, Lynch R, Ghishan FK. Gastrointestinal distribution and kinetic  
459 characterization of the sodium-hydrogen exchanger isoform 8 (NHE8). *Cell Physiol*  
460 *Biochem*. Karger Publishers; 2008;21(1-3):109–16.  
461

- 462 Xu H, Chen H, Li J, Zhao Y, Ghishan FK. Disruption of NHE8 expression impairs Leydig cell  
463 function in the testes. *American Journal of Physiology- Cell Physiology*. American  
464 Physiological Society; 2015 Feb 15;308(4):C330–8.  
465
- 466 Yu F, Shen X-Y, Fan L, Yu Z-C. Genome-wide analysis of genetic variations assisted by  
467 Ingenuity Pathway Analysis to comprehensively investigate potential genetic targets  
468 associated with the progression of hepatocellular carcinoma. *Eur Rev Med*  
469 *Pharmacol Sci*. 2014;18(15):2102–8.  
470
- 471 Zhang G, Feenstra B, Bacelis J, Liu X, Muglia LM, Juodakis J, et al. Genetic Associations with  
472 Gestational Duration and Spontaneous Preterm Birth. *N Engl J Med*. 2017 Sep  
473 21;377(12):1156–67.  
474
- 475 Zhang H, Baldwin DA, Bukowski RK, Parry S, Xu Y, Song C, et al. A genome-wide association  
476 study of early spontaneous preterm delivery. *Genet Epidemiol*. 2015  
477 Mar;39(3):217–26.  
478
- 479 Zhang W, Fan Z, Han E, Hou R, Zhang L, Galaverni M, et al. Hypoxia adaptations in the grey  
480 wolf (*Canis lupus chanco*) from Qinghai-Tibet Plateau. Akey JM, editor. *PLoS*  
481 *Genetics*. 2014 Jul;10(7):e1004466.  
482
- 483 Zhou X, Stephens M. Genome-wide efficient mixed-model analysis for association studies.  
484 *Nature Genetics*. 2012 Jun 17;44(7):821–4.  
485

# A. Cesarean Section

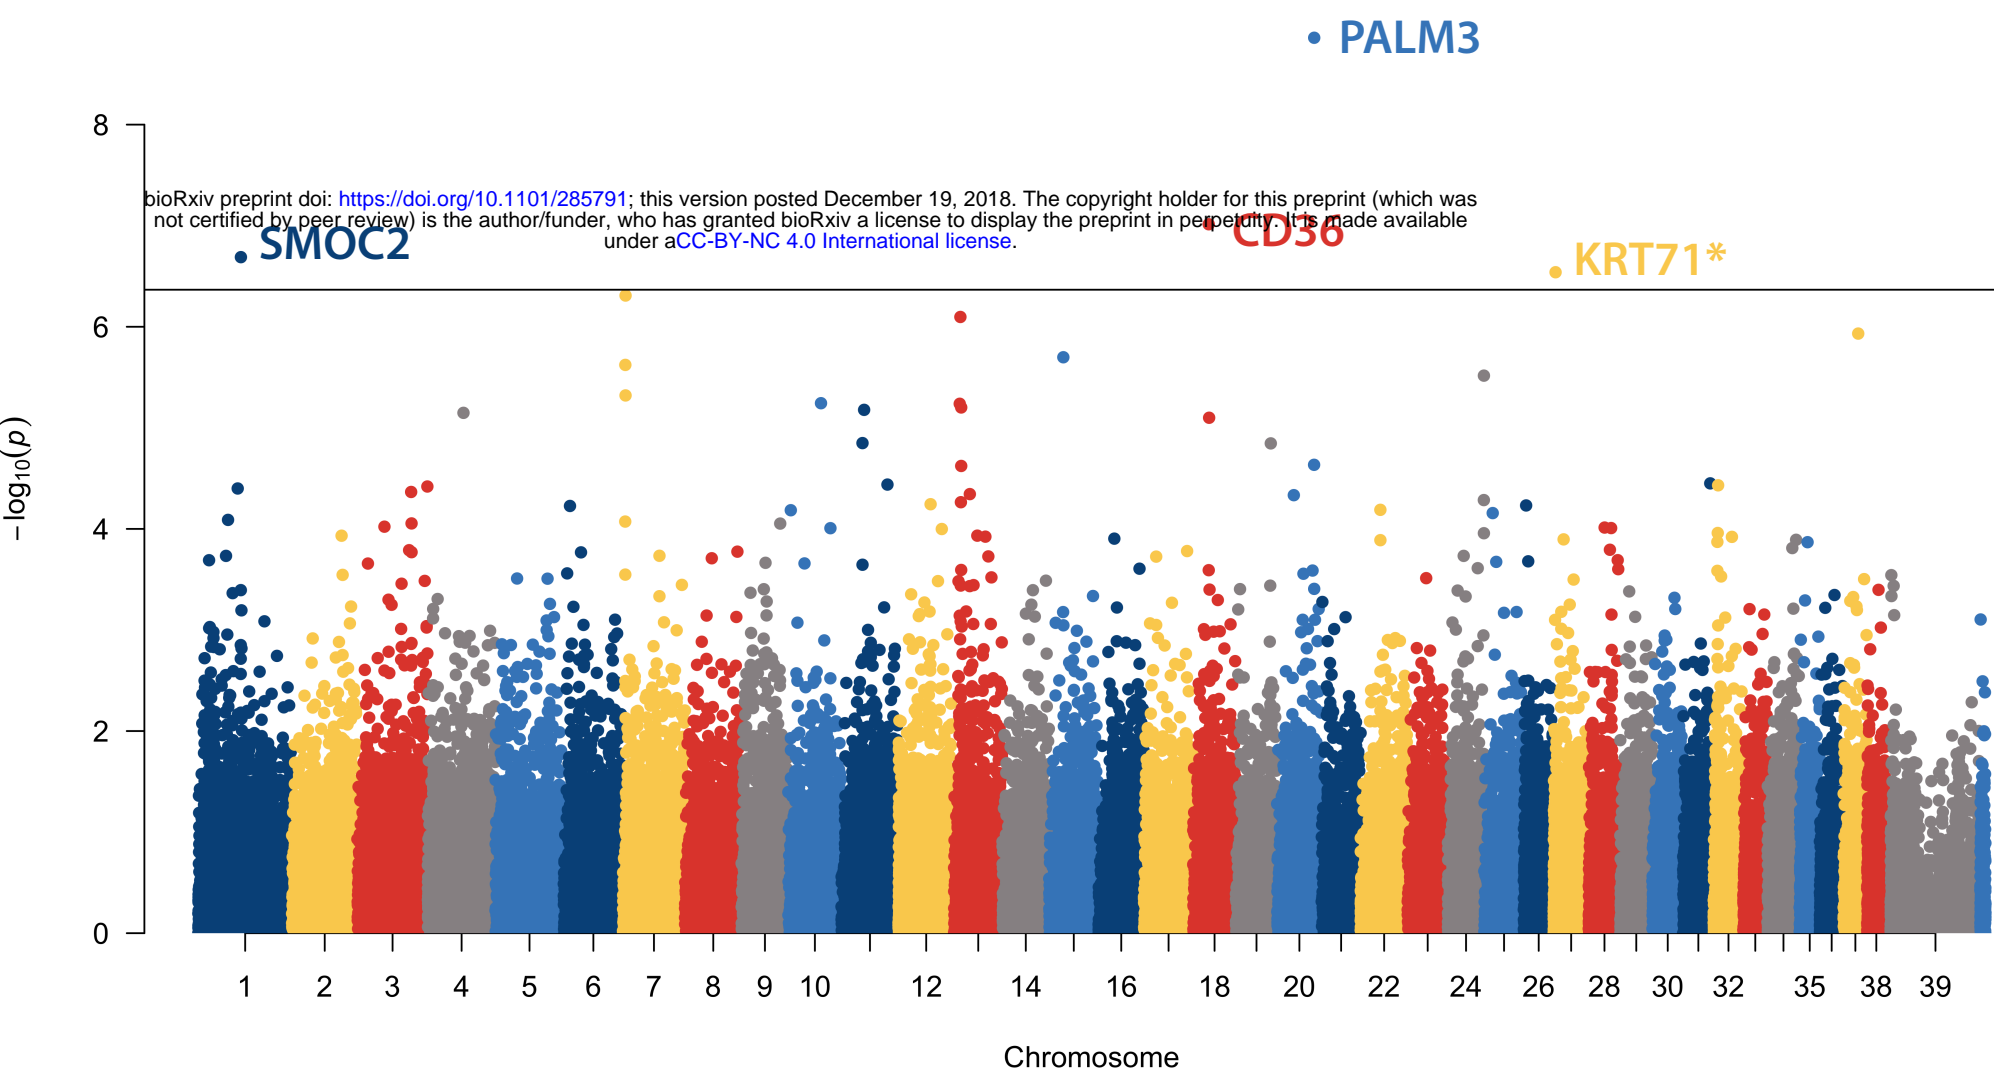

# B. Litter Size

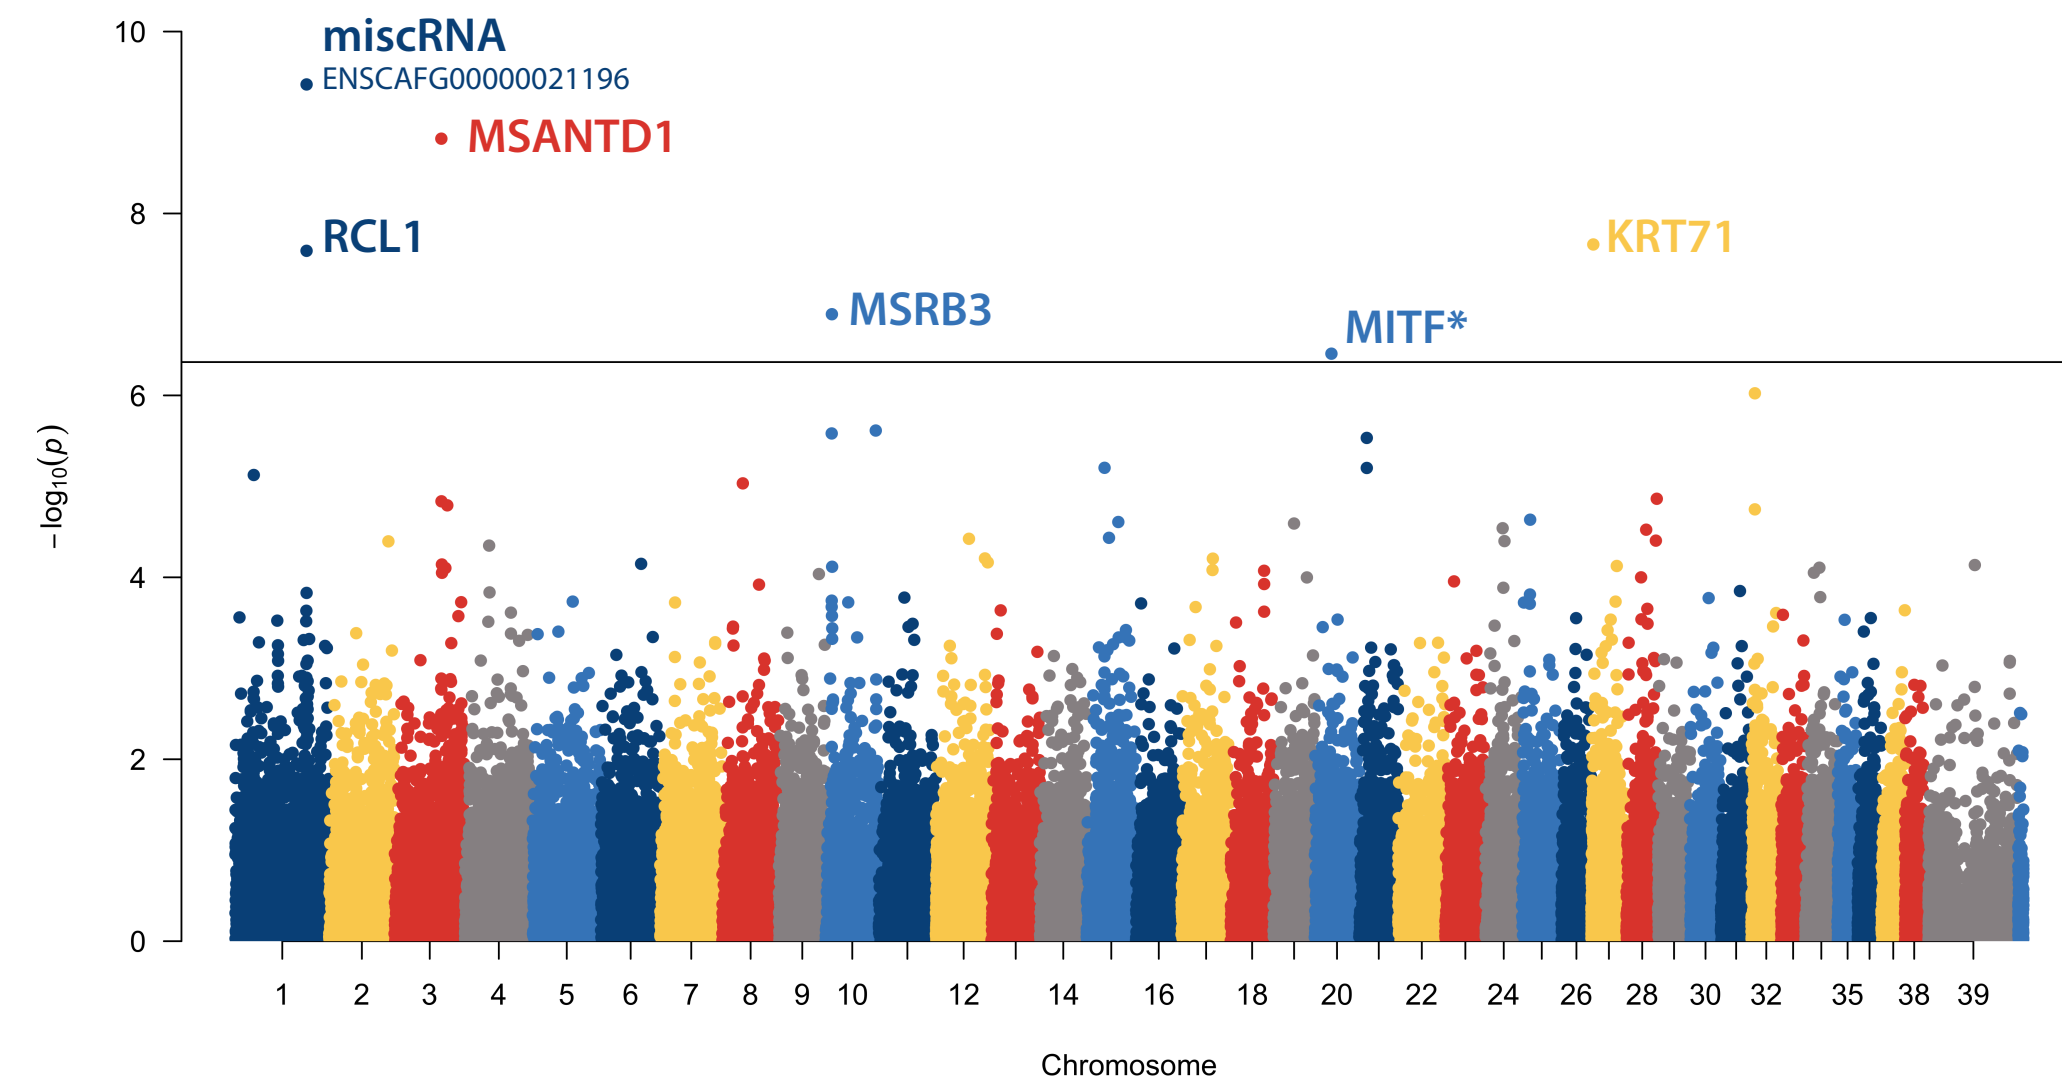

# C. Stillbirth

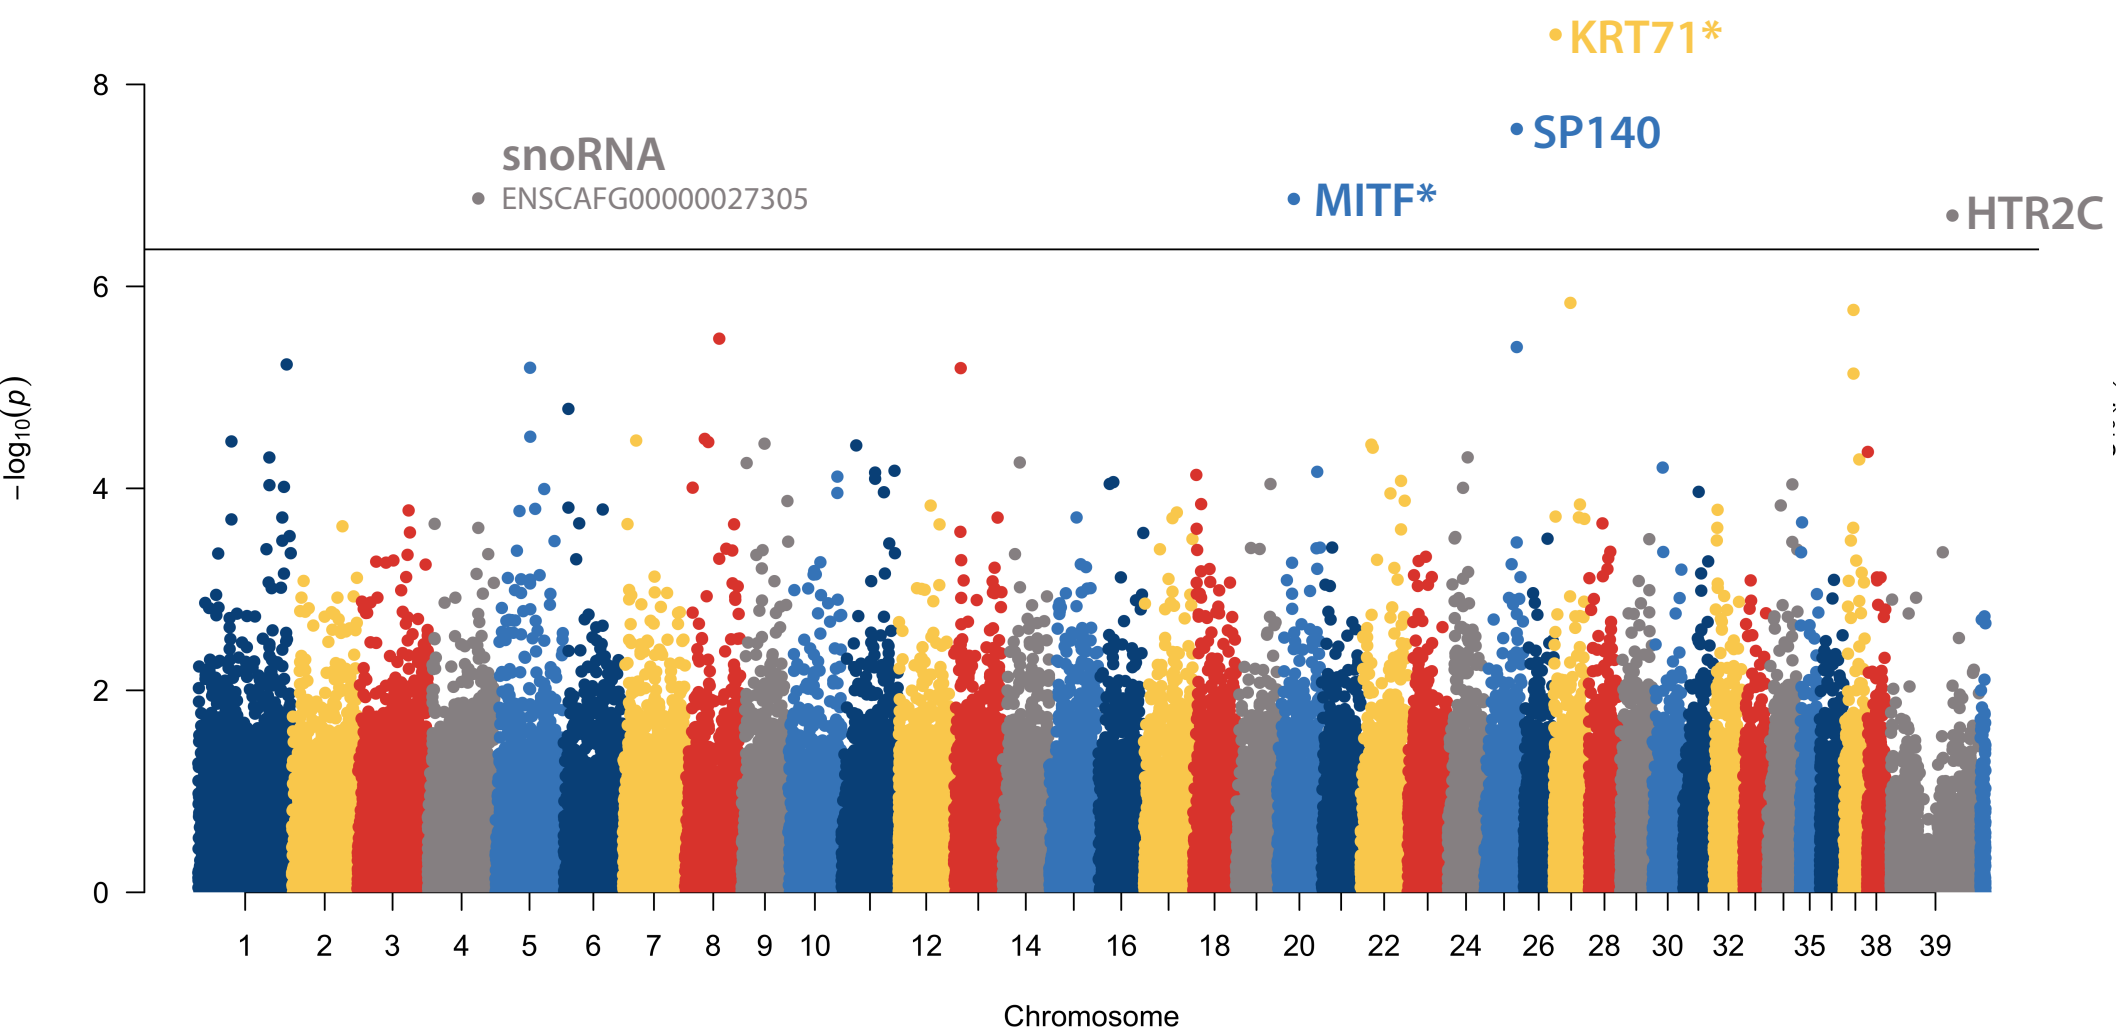

# D. Gestation Length

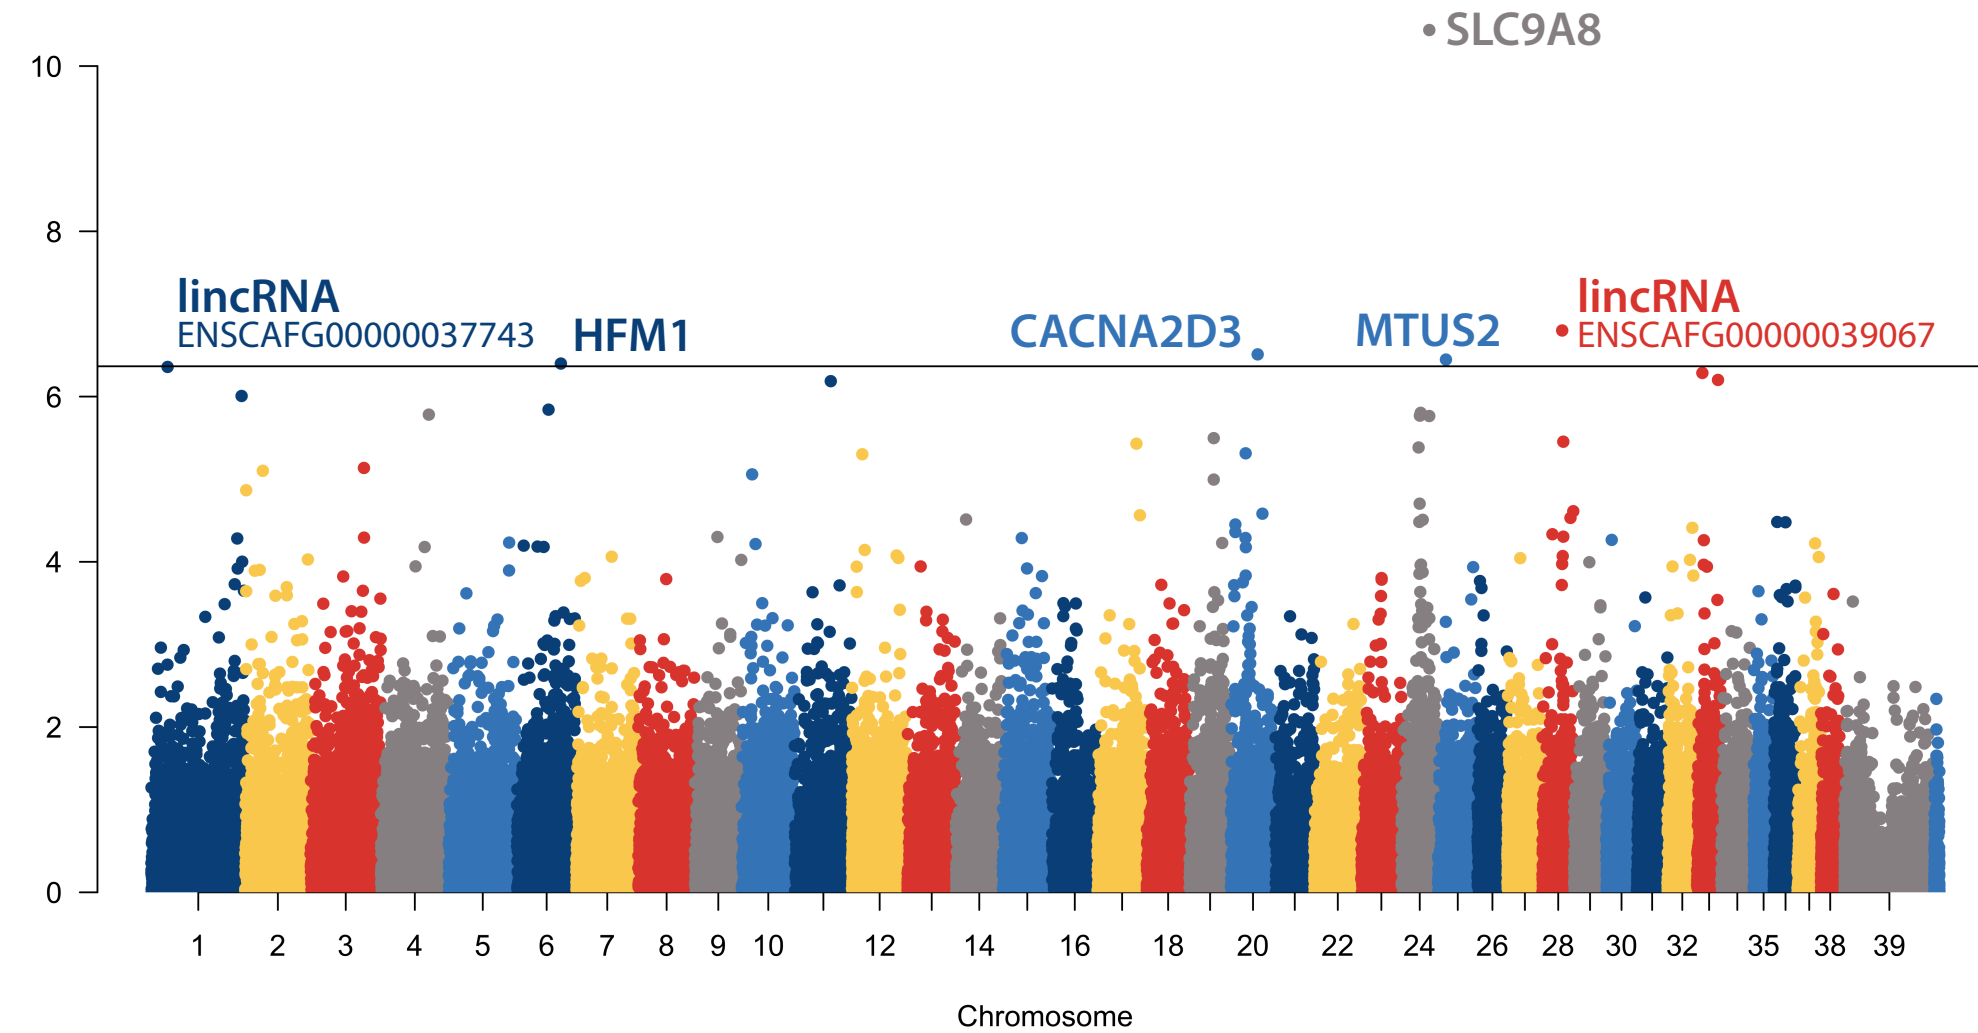

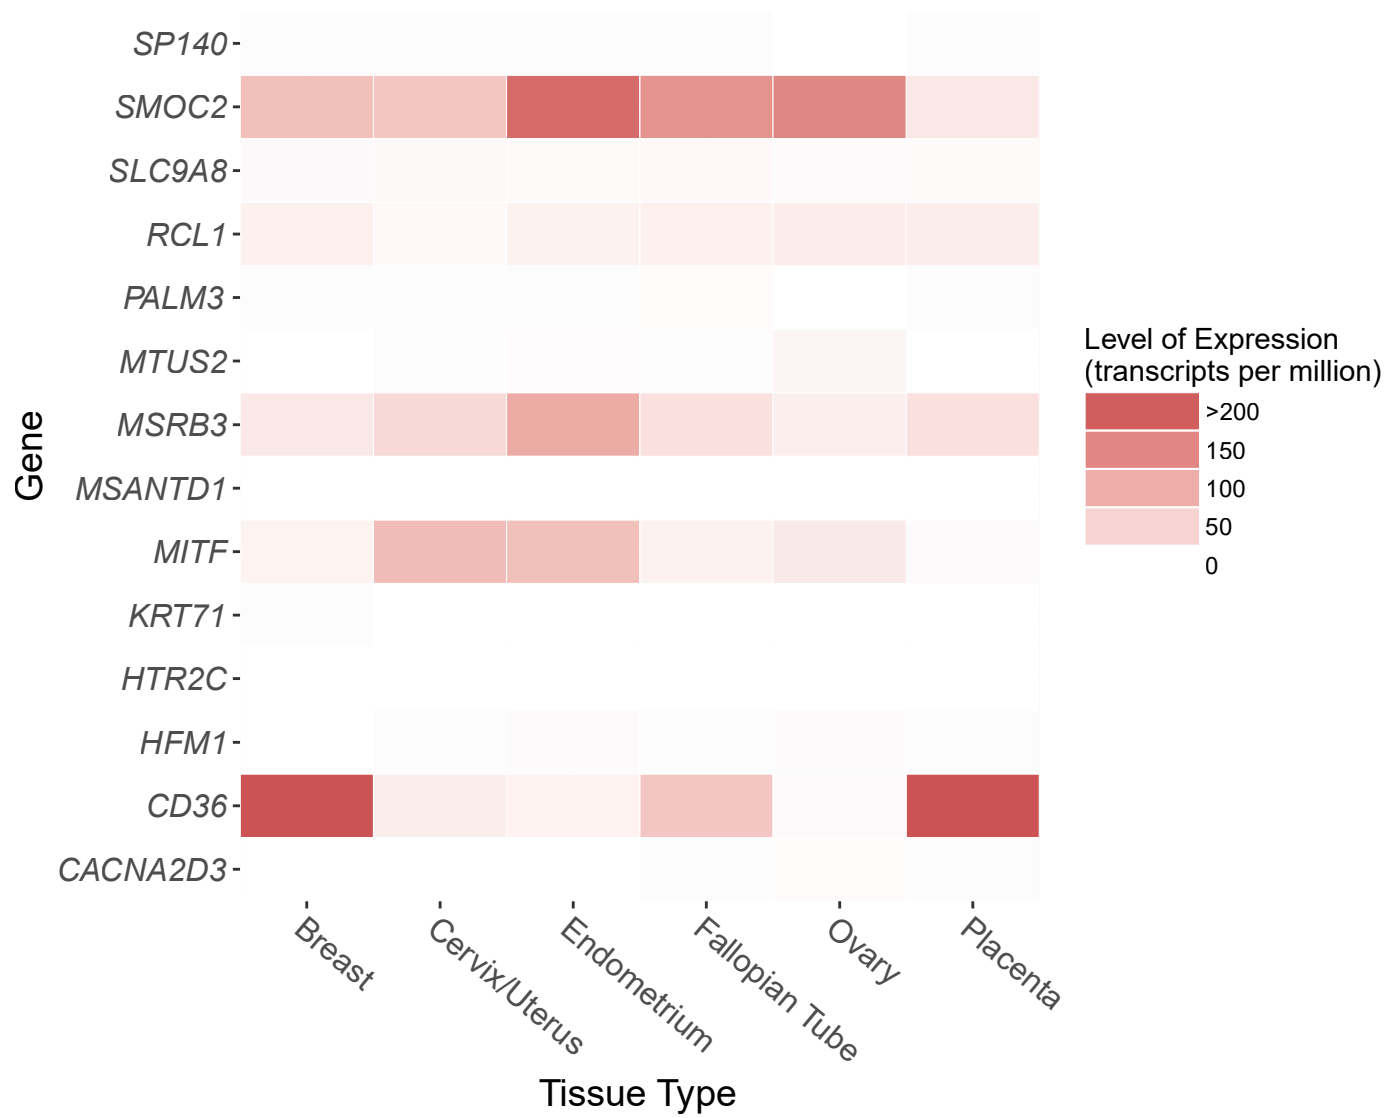

Source: http://biorxiv.org/content/10.1101/285791v2.full.pdf
